# Supplementary material for: Kinetically matched C–N coupling toward efficient urea electrosynthesis enabled on copper single-atom alloy
Source: PubMed Central journal article supplement (PMC10620222; doi:10.1038/s41467-023-42794-2), 2023-11-01
Supplement: 41467_2023_42794_MOESM1_ESM.pdf [file 41467_2023_42794_MOESM1_ESM.pdf]

# **Kinetically matched C–N coupling toward efficient urea electrosynthesis enabled on copper single-atom alloy**

Mengqiu Xu<sup>1,‡</sup>, Fangfang Wu<sup>2,‡</sup>, Ye Zhang<sup>1</sup>, Yuanhui Yao<sup>1</sup>, Genping Zhu<sup>1</sup>, Xiaoyu Li<sup>1</sup>, Liang Chen<sup>1\*</sup>, Gan Jia<sup>1</sup>, Xiaohong Wu<sup>3\*</sup>, Youju Huang<sup>1</sup>, Peng Gao<sup>1\*</sup> and Wei Ye<sup>1\*</sup>

<sup>1</sup>College of Material, Chemistry and Chemical Engineering, Key Laboratory of Organosilicon Chemistry and Material Technology, Ministry of Education, Hangzhou Normal University, Hangzhou, Zhejiang 311121, China.

<sup>2</sup>College of Materials Science and Engineering, Zhejiang University of Technology, Hangzhou, Zhejiang 310014, China.

<sup>3</sup>School of Chemistry and Chemical Engineering, Harbin Institute of Technology, Harbin, Heilongjiang 150001, P. R. China.

<sup>‡</sup>These authors contributed equally.

## Chemicals.

Nickel(II) nitrate hexahydrate ( $\text{Ni}(\text{NO}_3)_2 \cdot 6\text{H}_2\text{O}$ , A.R.), copper(II) chloride dihydrate ( $\text{CuCl}_2 \cdot 2\text{H}_2\text{O}$ , A.R.), potassium palladium(II) chloride ( $\text{K}_2\text{PdCl}_4$ , A.R.), iron(III) trichloride hexahydrate ( $\text{FeCl}_3 \cdot 6\text{H}_2\text{O}$ , A.R.), tetrabutyl titanate ( $\text{C}_{16}\text{H}_{36}\text{O}_4\text{Ti}$ , A.R.), diacetylmonoxime ( $\text{C}_4\text{H}_7\text{NO}_2$ , A.R.), thiosemicarbazide ( $\text{CH}_5\text{N}_3\text{S}$ , A.R.), urease, urea ( $\text{CH}_4\text{N}_2\text{O}$ , A.R.), carbon black, sodium borohydride ( $\text{NaBH}_4$ , A.R.), sodium salicylate ( $\text{NaC}_7\text{H}_5\text{O}_3$ , A.R.), Monopotassium monosodium tartrate tetrahydrate ( $\text{KNaC}_4\text{H}_{12}\text{O}_{10}$ , A.R.), sodium hydroxide ( $\text{NaOH}$ , A.R.), sodium hypochlorite ( $\text{NaClO}$ , A.R.), EDTA disodium salt dehydrate ( $\text{C}_{10}\text{H}_{20}\text{N}_2\text{Na}_2\text{O}_{10}$ , A.R.), sodium nitroprusside ( $\text{FeNa}_2\text{C}_5\text{H}_4\text{N}_6\text{O}_3$ , A.R.), 4-methoxybenzyl alcohol ( $\text{C}_8\text{H}_{10}\text{O}_2$ , A.R.), triethylene glycol ( $\text{C}_6\text{H}_{14}\text{O}_4$ , A.R.), ammonium chloride ( $\text{NH}_4\text{Cl}$ , A.R.), sodium nitrite ( $\text{NaNO}_2$ , A.R.), ethanol ( $\text{EtOH}$ , A.R.),  $^{15}\text{N}$ -labeled potassium nitrate ( $\text{K}^{15}\text{NO}_3$ ,  $\geq 99.5\%$ ), potassium nitrate ( $\text{KNO}_3$ , A.R.), potassium hydroxide ( $\text{KOH}$ , A.R.), potassium bicarbonate ( $\text{KHCO}_3$ , A.R.), ultra-high purity  $\text{CO}_2$  (99.999%), ultra-high purity Ar (99.999%), Nessler reagent and Griess reagent were purchased from Sinopharm Chemical Reagent Co. Ltd. (Shanghai, China). All chemicals were used without further purification. All aqueous solutions were prepared using de-ionized (DI) water with a resistivity of  $18.25 \text{ M}\Omega \cdot \text{cm}^{-1}$ .

## Synthesis of $\text{TiO}_2$ nanosheets

Tetrabutyl titanate (10 mL) was added in an autoclave with a Teflon liner. Then HF solution (4 mL) was added and stirred for 10 min. After that, absolute ethanol (10 mL) was then added into the mixture and stirred for another 10 min. The mixture was transferred and sealed in an autoclave with a Teflon liner, and heated at  $180 \text{ }^\circ\text{C}$  for 16 h. After it was cooled to room temperature, the product was collected with centrifugation and washed with  $\text{NaOH}$  (0.1 M) solution and DI water at least five times. The product was dried a vacuum oven at  $80 \text{ }^\circ\text{C}$  for 24 h.<sup>[S1]</sup>

## Synthesis of $\text{Pd}_4\text{Cu}_1$ -rGO composite structure

Graphene oxide (15.35 mL, 2.3 wt.%) was diluted into 20 mL DI water. Then,  $\text{K}_2\text{PdCl}_4$  (3.13 mg) and  $\text{CuCl}_2 \cdot 2\text{H}_2\text{O}$  (0.4 mg) were dissolved in the above solution. After ultrasound for 10 min, ice water cooled  $\text{NaBH}_4$  solution (10 mM, 6 mL) was dropped in the mixture to reduce  $\text{Pd}^{2+}$  and  $\text{Cu}^{2+}$  to form  $\text{Pd}_4\text{Cu}_1$  alloy cluster. After stirring for another 1 h, the mixture was transferred and sealed in an autoclave with a Teflon liner, heated at  $110 \text{ }^\circ\text{C}$  for 3 h. The final product was collected by centrifugation, washed three times with water, and freeze-dried.

## Supplementary Figures:

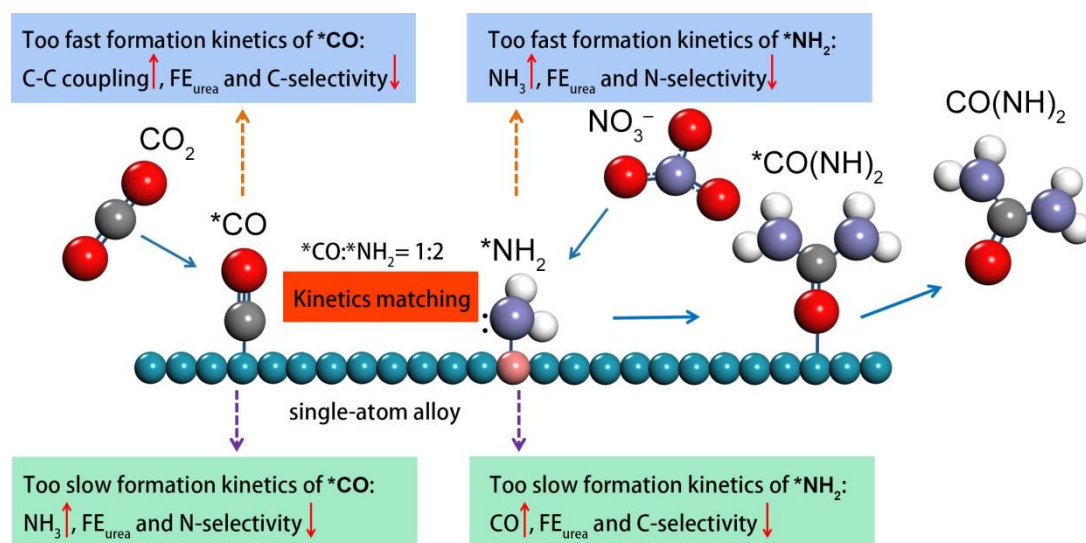

**Supplementary Fig. 1.** Schematic demonstration of kinetics matching of CO<sub>2</sub>RR and NO<sub>3</sub>RR in C–N coupling toward urea electro-synthesis.

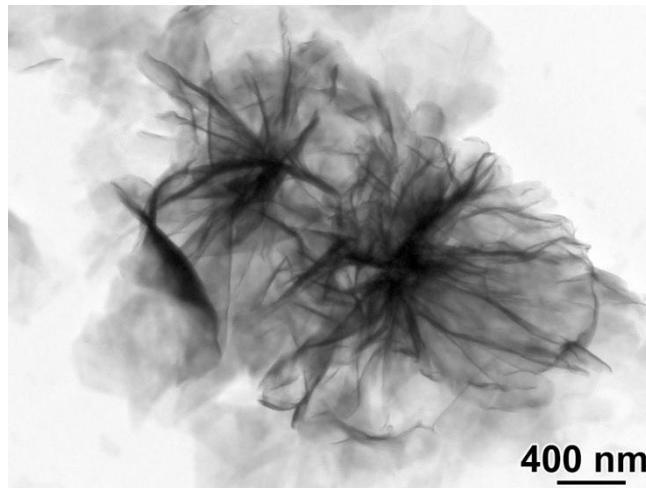

**Supplementary Fig. 2.** TEM image of layered  $\alpha$ -Ni(OH)<sub>2</sub> nanosheets.

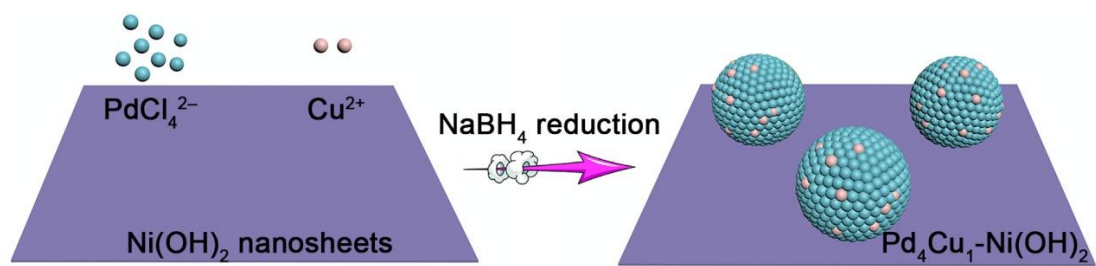

**Supplementary Fig. 3.** Schematic depiction of the synthesis of Pd<sub>4</sub>Cu<sub>1</sub>-Ni(OH)<sub>2</sub> composite structure.

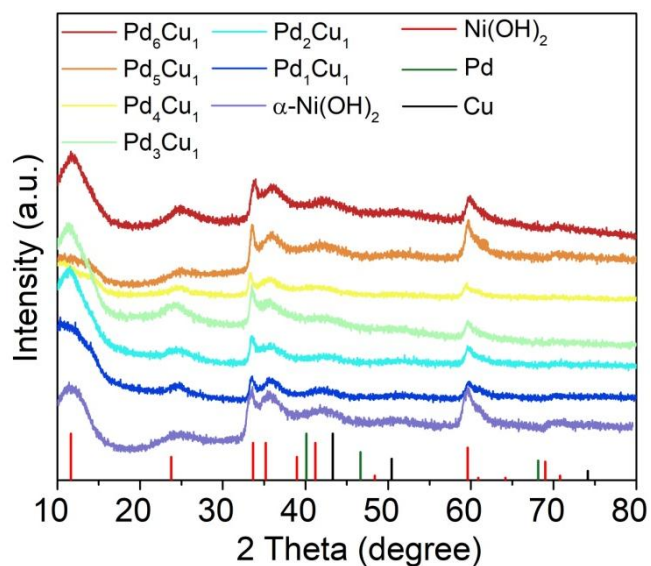

**Supplementary Fig. 4.** Powder XRD patterns of bare  $\alpha$ -Ni(OH)<sub>2</sub> nanosheets, Pd<sub>1</sub>Cu<sub>1</sub>-Ni(OH)<sub>2</sub>, Pd<sub>2</sub>Cu<sub>1</sub>-Ni(OH)<sub>2</sub>, Pd<sub>3</sub>Cu<sub>1</sub>-Ni(OH)<sub>2</sub>, Pd<sub>4</sub>Cu<sub>1</sub>-Ni(OH)<sub>2</sub>, Pd<sub>5</sub>Cu<sub>1</sub>-Ni(OH)<sub>2</sub>, and Pd<sub>6</sub>Cu<sub>1</sub>-Ni(OH)<sub>2</sub> composite samples. The standard diffraction patterns for  $\alpha$ -Ni(OH)<sub>2</sub> (JCPDS No. 22-0444), *fcc* Pd (JCPDS No. 46-1043) and *fcc* Cu (JCPDS No. 04-0836) are provided as references.

**Notes:** As shown in Supplementary Fig. 4, the composite samples (Pd<sub>x</sub>Cu<sub>1</sub>-Ni(OH)<sub>2</sub>, x=1, 2, 3, 4, 5, 6) only display diffraction patterns of  $\alpha$ -Ni(OH)<sub>2</sub>, and the diffraction patterns of metallic Pd/Cu are not emerged. The possible reason may be due to the small size of Pd<sub>x</sub>Cu<sub>1</sub> clusters.

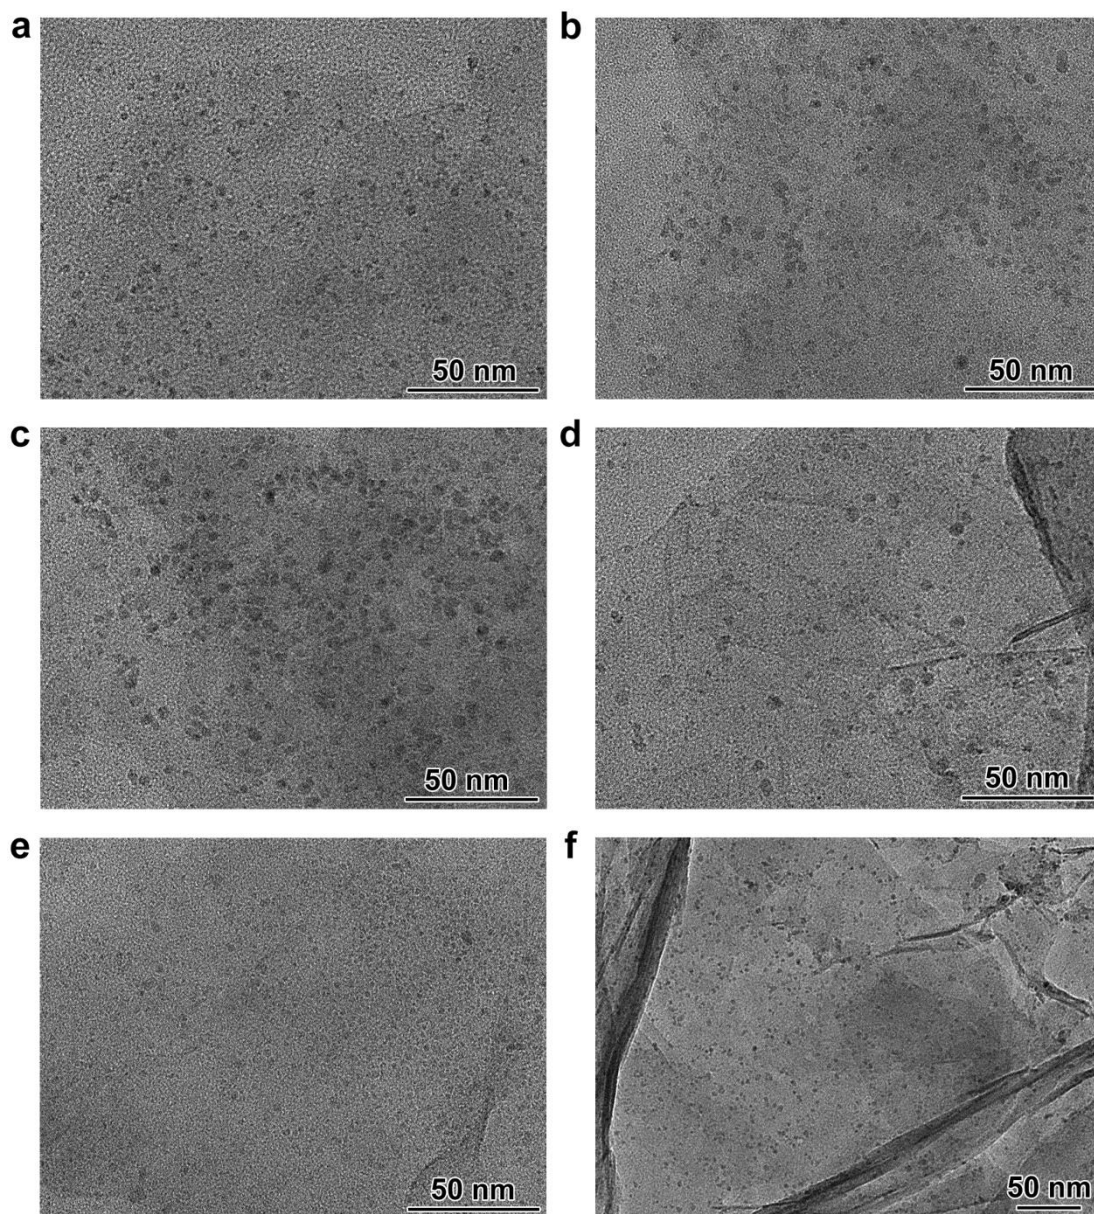

**Supplementary Fig. 5.** TEM images of (a) Pd<sub>1</sub>Cu<sub>1</sub>-Ni(OH)<sub>2</sub>, (b) Pd<sub>2</sub>Cu<sub>1</sub>-Ni(OH)<sub>2</sub>, (c) Pd<sub>3</sub>Cu<sub>1</sub>-Ni(OH)<sub>2</sub>, (d) Pd<sub>5</sub>Cu<sub>1</sub>-Ni(OH)<sub>2</sub>, (e) Pd<sub>6</sub>Cu<sub>1</sub>-Ni(OH)<sub>2</sub> and (f) Pd-Ni(OH)<sub>2</sub> composite samples.

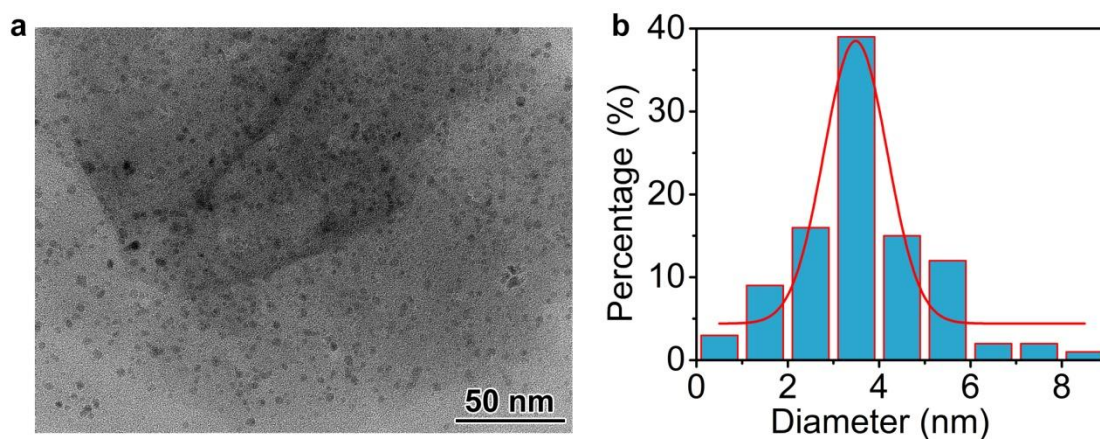

**Supplementary Fig. 6.** (a) TEM image of Pd<sub>4</sub>Cu<sub>1</sub>-Ni(OH)<sub>2</sub> composite sample. (b) The particle size distribution diagram of Pd<sub>4</sub>Cu<sub>1</sub> clusters.

**Notes:** As shown in Supplementary Fig. 5 and 6, Pd<sub>x</sub>Cu<sub>1</sub> clusters (x=1, 2, 3, 4, 5, 6) anchored on α-Ni(OH)<sub>2</sub> display comparable size distribution, which is a prerequisite for the comparison of catalytic activity.



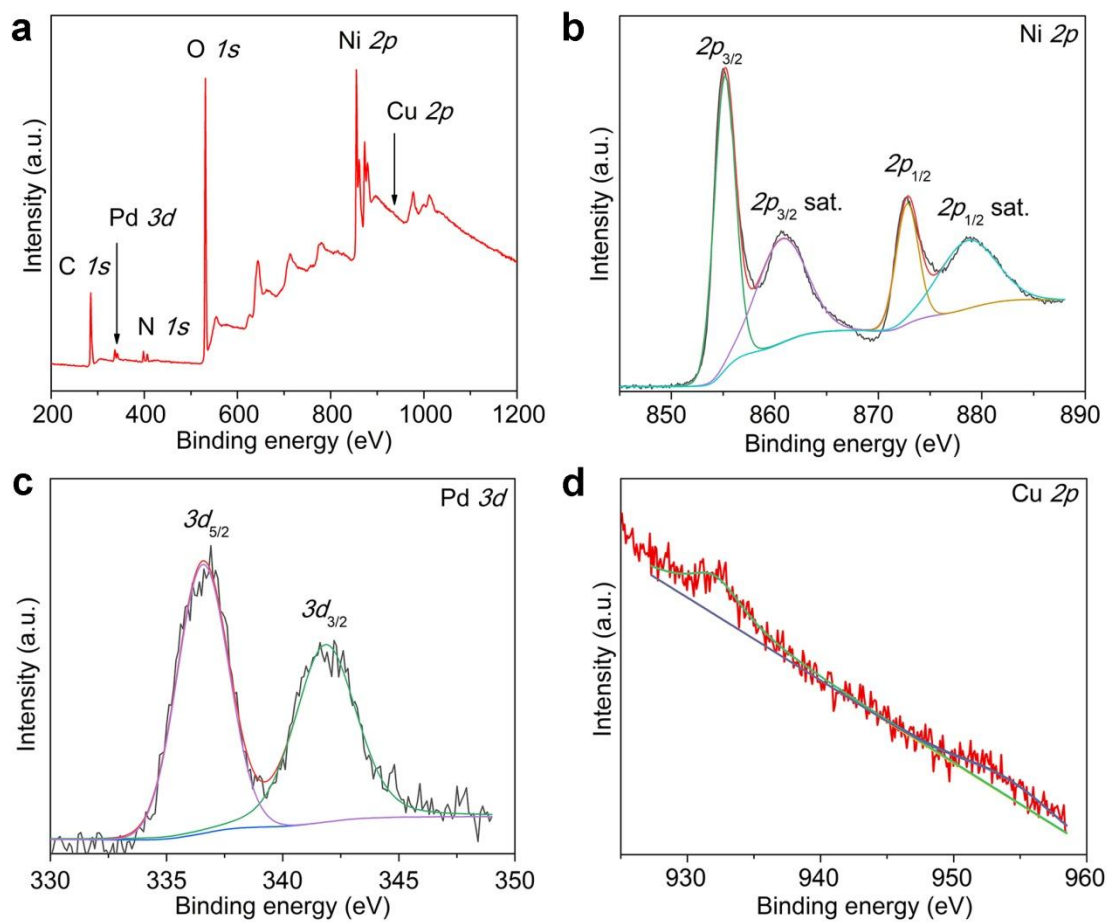

**Supplementary Fig. 7.** XPS characterizations of Pd<sub>4</sub>Cu<sub>1</sub>-Ni(OH)<sub>2</sub> sample: (a) survey, (b) Ni 2p, (c) Pd 3d, (d) Cu 2p.

**Notes:** As shown in Supplementary Fig. 7, the survey spectrum confirms the existence of Pd, Cu, Ni and O elements. The binding energies located at 855.2 and 872.9 eV can be assigned to  $2p_{3/2}$  and  $2p_{1/2}$  of Ni<sup>2+</sup>, respectively (Supplementary Fig. 7b). Another pairs of binding energies located at 860.8 and 879.0 eV are assigned to the satellite peaks of  $2p_{3/2}$  and  $2p_{1/2}$ , respectively.<sup>[S2]</sup>

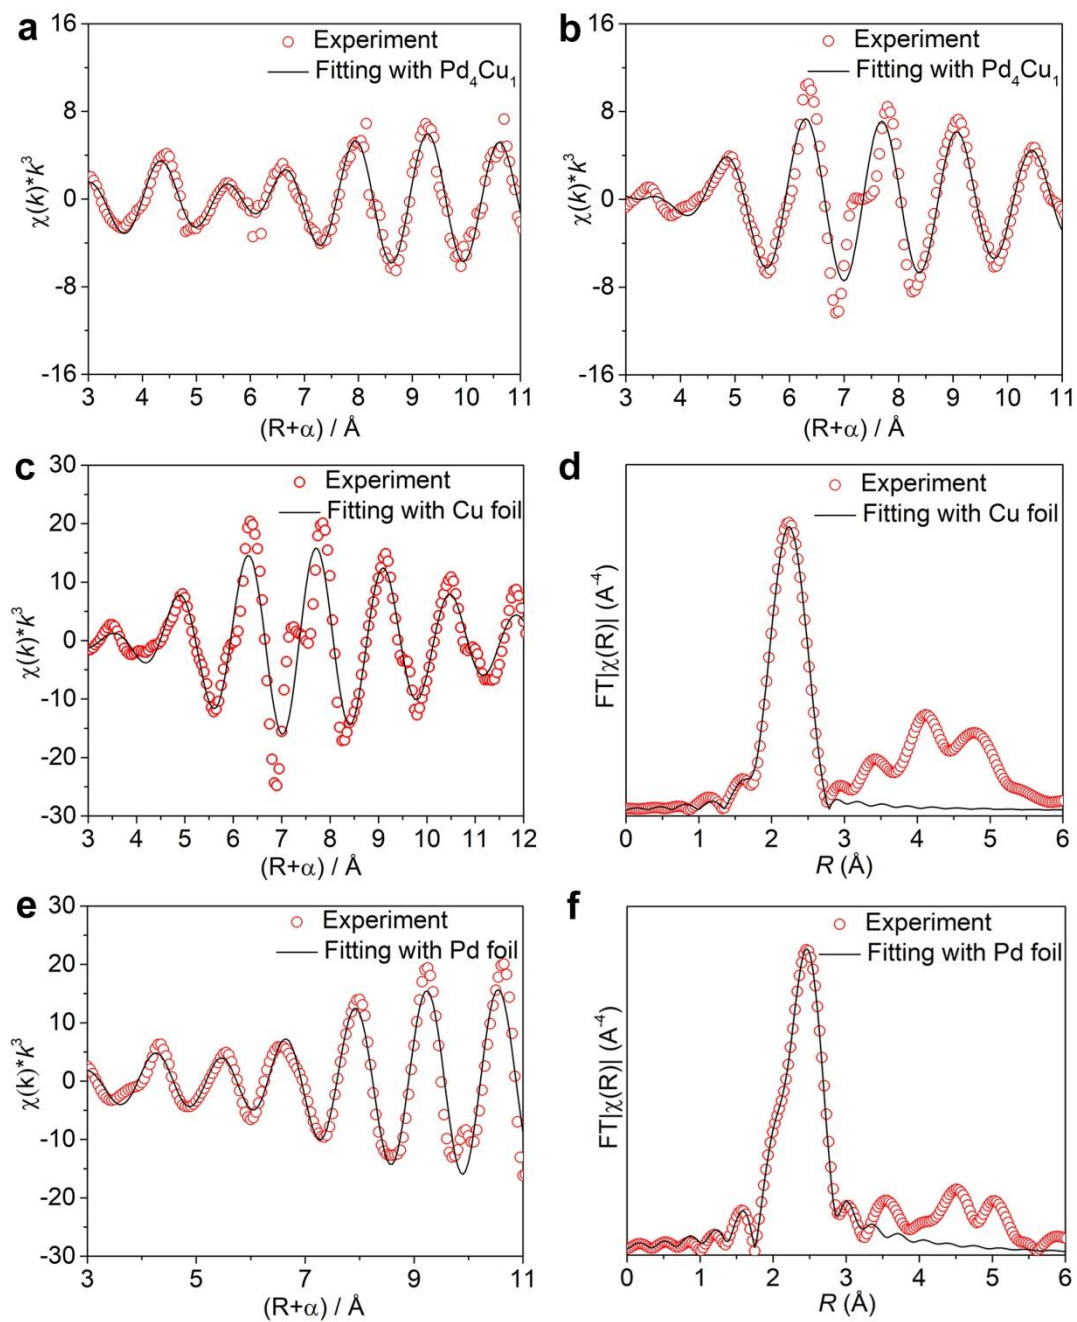

**Supplementary Fig. 8.** (a,b) The corresponding EXAFS  $k$  space fitting curves of  $\text{Pd}_4\text{Cu}_1\text{-Ni(OH)}_2$  sample. The corresponding EXAFS fitting curves of (c,d) Cu foil and (e,f) Pd foil.

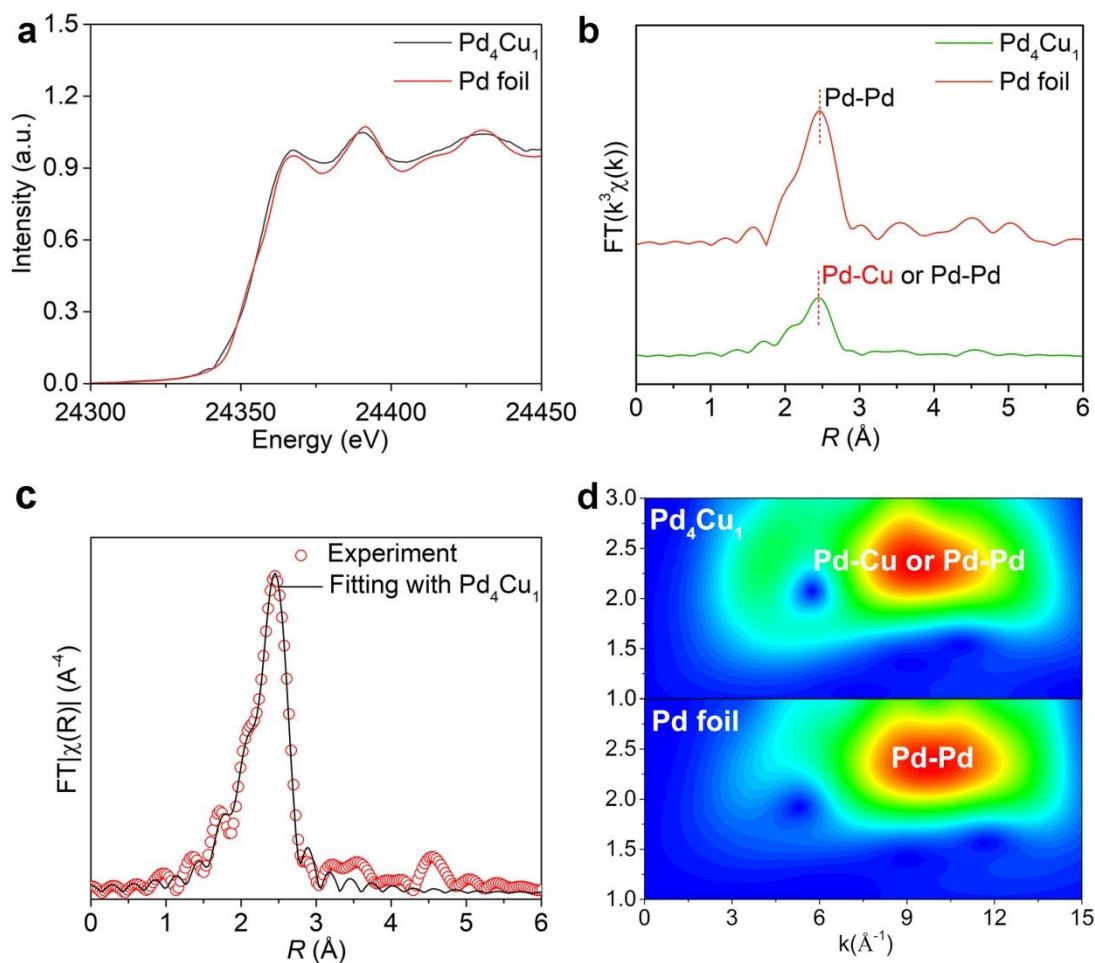

**Supplementary Fig. 9.** (a) Normalized Pd K-edge XANES spectra of Pd<sub>4</sub>Cu<sub>1</sub> in reference with Pd foil, (b)  $k^3$ -weighted Fourier-transform Pd K-edge EXAFS spectra, (c) the experimental Pd K-edge EXAFS spectrum (red circle) and the fitting curve (black line) of Pd<sub>4</sub>Cu<sub>1</sub>. (d) Wavelet transforms of the  $k^2$ -weighted Pd K-edge EXAFS signals for the high-coordination shells in reference with Pd foil.

**Notes:** Pd K-edge XANES spectrum of Pd<sub>4</sub>Cu<sub>1</sub>-Ni(OH)<sub>2</sub> was also obtained in reference with Pd foil (Supplementary Fig. 9). The two curves are almost overlapped, indicating metallic Pd feature in Pd<sub>4</sub>Cu<sub>1</sub>-Ni(OH)<sub>2</sub> sample. Pd–Pd (2.70 Å) and Pd–Cu (2.62 Å) bonds are all resolved with CNs of 7.9 and 1.4 in Pd K-edge EXAFS (Supplementary Table 2), respectively. Consistent with Cu case, the fitting curve is almost overlapped with experiment spectrum, validating the reliability of the fitting result (Supplementary Fig. 8 and 9c). Wavelet transforms (WT) analysis of the Pd K-edge EXAFS oscillations of Pd<sub>4</sub>Cu<sub>1</sub>-Ni(OH)<sub>2</sub> sample resolves Pd–Cu bond (Supplementary Fig. 9d).

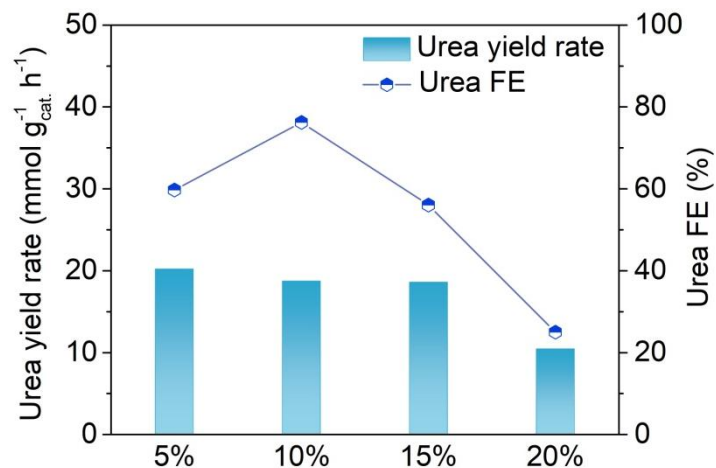

**Supplementary Fig. 10.** The relationship of urea yield rates and FEs with varied loading amounts of Pd<sub>4</sub>Cu<sub>1</sub> in Pd<sub>4</sub>Cu<sub>1</sub>-Ni(OH)<sub>2</sub> composite sample at -0.5 V in H-type cell.

**Notes:** We investigated the effect of loading amount of Pd<sub>4</sub>Cu<sub>1</sub> clusters on urea yield rate and FE at -0.5 V. As shown in Supplementary Fig. 10, urea yield rates are comparable with 5%, 10% and 15% loading amount. Urea FEs show a volcano plot with the loading amounts, and the optimal urea yield rate and urea FE were obtained with Pd<sub>4</sub>Cu<sub>1</sub> loading amount of 10%.

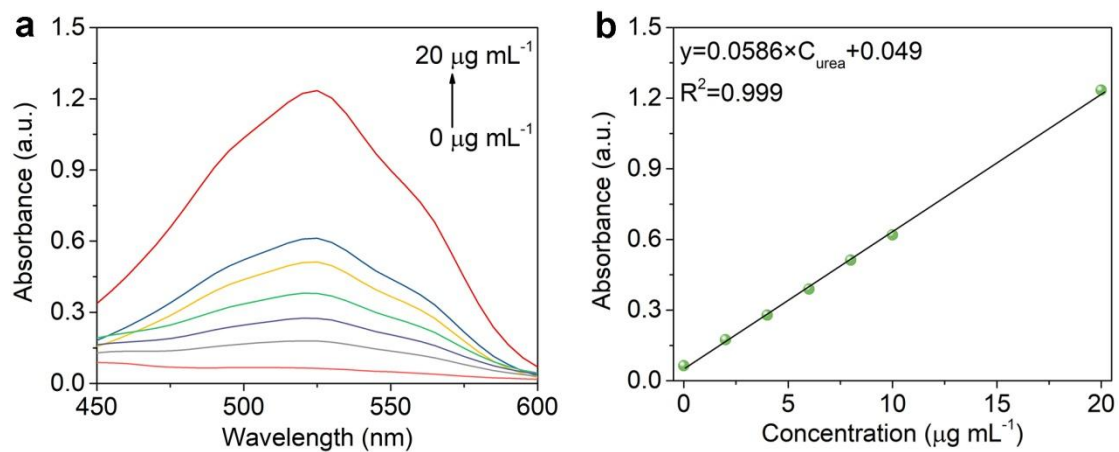

**Supplementary Fig. 11.** (a) UV-Vis absorption curves of diacetyl monoxime assays with varied concentrations of urea after heating at 100 °C for 20 min. (b) Calibration curve used for urea estimation.

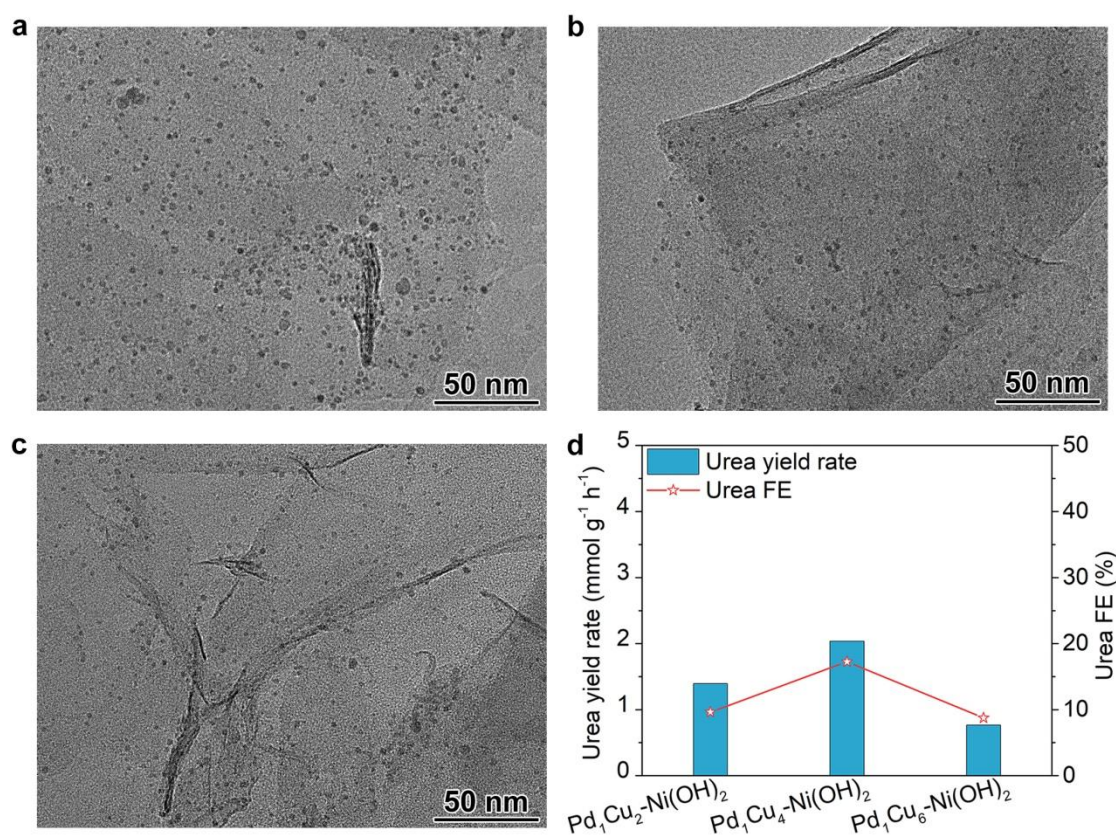

**Supplementary Fig. 12.** (a-c) TEM images of Pd<sub>1</sub>Cu<sub>2</sub>-Ni(OH)<sub>2</sub>, Pd<sub>1</sub>Cu<sub>4</sub>-Ni(OH)<sub>2</sub>, and Pd<sub>1</sub>Cu<sub>6</sub>-Ni(OH)<sub>2</sub> samples. (d) Urea yield rates and FEs of the three samples.

**Notes:** To further demonstrate the unique role of Cu single-atom in Pd host, we also prepared Pd single-atom in Cu lattice as a comparison. As shown in Supplementary Fig. 12a-12c, Pd<sub>1</sub>Cu<sub>2</sub>, Pd<sub>1</sub>Cu<sub>4</sub> and Pd<sub>1</sub>Cu<sub>6</sub> clusters are successfully anchored on Ni(OH)<sub>2</sub> nanosheets. Urea yield rates and urea FEs are 0.77, 2.03, 1.39 mmol g<sup>-1</sup> h<sup>-1</sup> and 8.7%, 17.3%, 9.6% for Pd<sub>1</sub>Cu<sub>6</sub>-Ni(OH)<sub>2</sub>, Pd<sub>1</sub>Cu<sub>4</sub>-Ni(OH)<sub>2</sub> and Pd<sub>1</sub>Cu<sub>2</sub>-Ni(OH)<sub>2</sub> composite catalysts (Supplementary Fig. 12d), respectively. Urea yield rates and urea FEs all lower than that of Pd<sub>4</sub>Cu<sub>1</sub>-Ni(OH)<sub>2</sub>, suggesting the unique role of Cu single-atom alloy in promoting urea electrosynthesis.

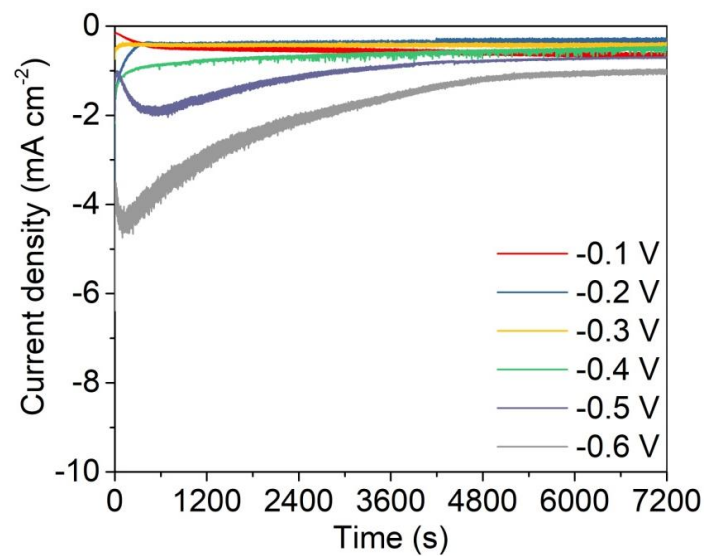

**Supplementary Fig. 13.** Potential-dependent  $I-t$  curves of  $\text{Pd}_4\text{Cu}_1\text{-Ni}(\text{OH})_2$  sample in the mixture of  $\text{KHCO}_3$  (0.1 M) and  $\text{KNO}_3$  (0.1 M) in H-type cell under continuous  $\text{CO}_2$  flow.

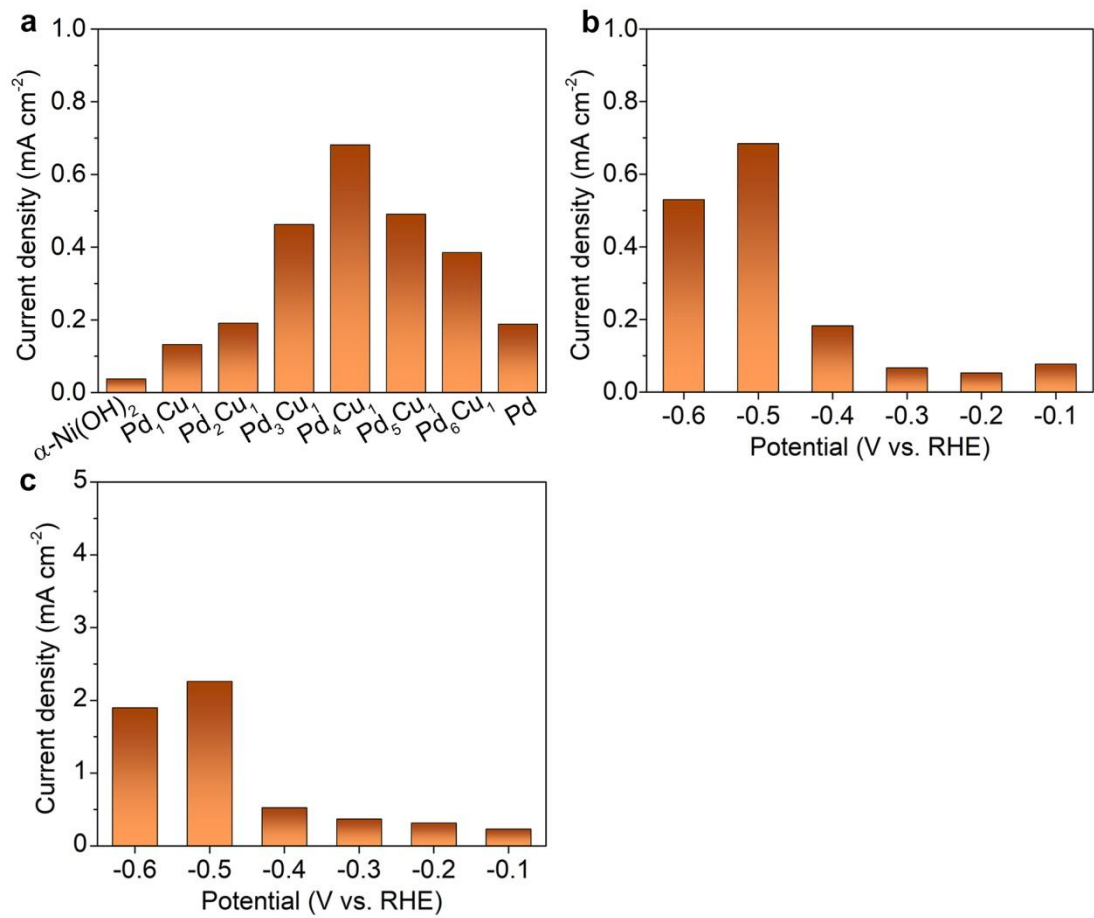

**Supplementary Fig. 14.** Urea partial current densities for (a) Pd<sub>x</sub>Cu<sub>1</sub>-Ni(OH)<sub>2</sub> (x=1-6) composite samples at -0.5 V, (b) Pd<sub>4</sub>Cu<sub>1</sub>-Ni(OH)<sub>2</sub> in H-type cell and (c) in GDE.



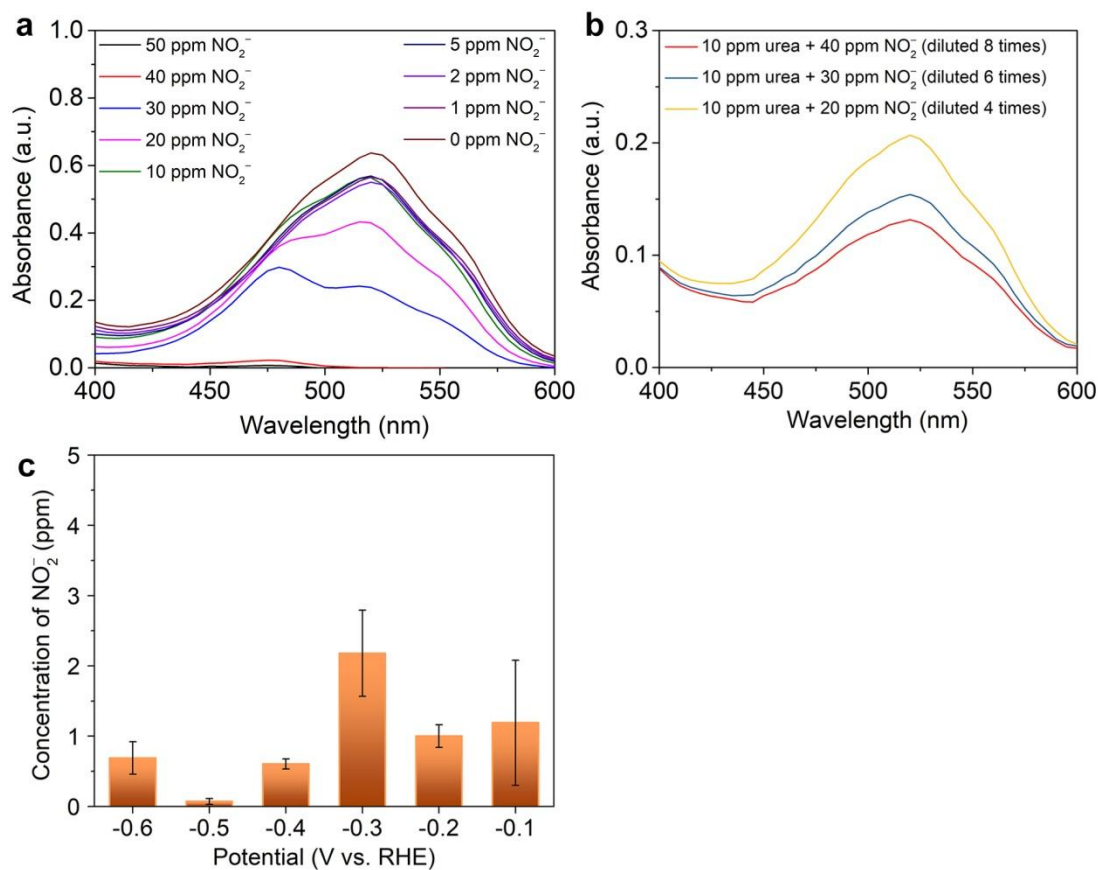

**Supplementary Fig. 15.** (a) UV-Vis absorption curves of urea (10 ppm) with different concentrations of  $\text{NO}_2^-$ , (b) UV-Vis absorption curves of the diluted solutions. (c) Potential-dependent concentrations of  $\text{NO}_2^-$  in the electrolyte. (c) Error bars in accordance with the standard deviation of at least three independent measurements.

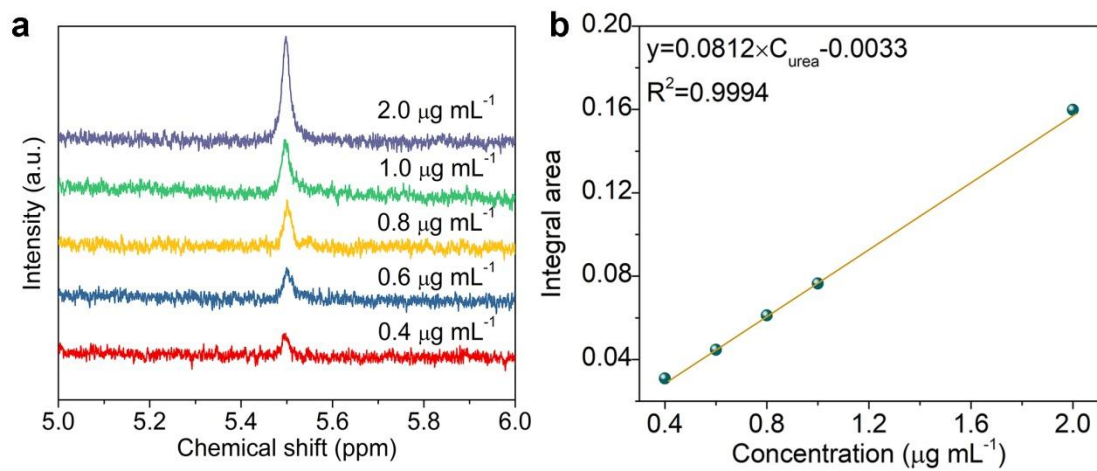

**Supplementary Fig. 16.** (a) <sup>1</sup>H-NMR spectra (500 MHz) recorded in a series of urea solutions with different concentrations. (b) Calibration curve used for urea quantification.

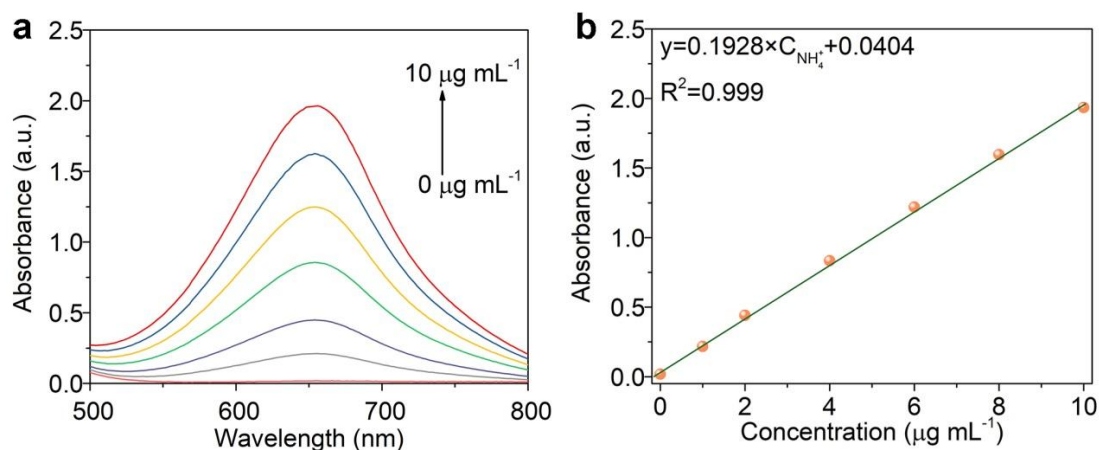

**Supplementary Fig. 17.** UV-Vis curves of indophenol assays with  $\text{NH}_4^+$  ions and (b) calibration curve used for estimation of  $\text{NH}_3$ .

**Notes:** In order to investigate the impact of  $\text{NO}_2^-$  on the quantification of urea in the electrolyte, we firstly obtained UV-Vis absorption curves of 10 ppm urea with different concentrations of  $\text{NO}_2^-$ . As shown in Supplementary Fig. 15a, the absorbance at 524 nm is really declined when the concentrations of  $\text{NO}_2^-$  surpass 10 ppm. As the concentrations of  $\text{NO}_2^-$  decline to 10, 5, 2, 1 ppm, the absorption curves are almost overlapped, but slightly lower than that without  $\text{NO}_2^-$ . The results indicate that  $\text{NO}_2^-$  will not greatly affect the quantification of urea when the concentrations are less than 10 ppm. This conclusion is further confirmed by diluting results (Supplementary Fig. 15b). Therefore, we also quantified the concentrations of  $\text{NO}_2^-$  in the electrolyte. As shown in Supplementary Fig. 15c, the concentrations of  $\text{NO}_2^-$  in the electrolyte all lower than 3 ppm, suggesting the accuracy of spectrophotometric result. In order to further confirm the concentration of urea in the electrolyte, the quantification of urea were further carried out with  $^1\text{H-NMR}$  (Supplementary Fig. 16) and urease method (Supplementary Fig. 17). The results for the estimation of urea concentrations are consistent.

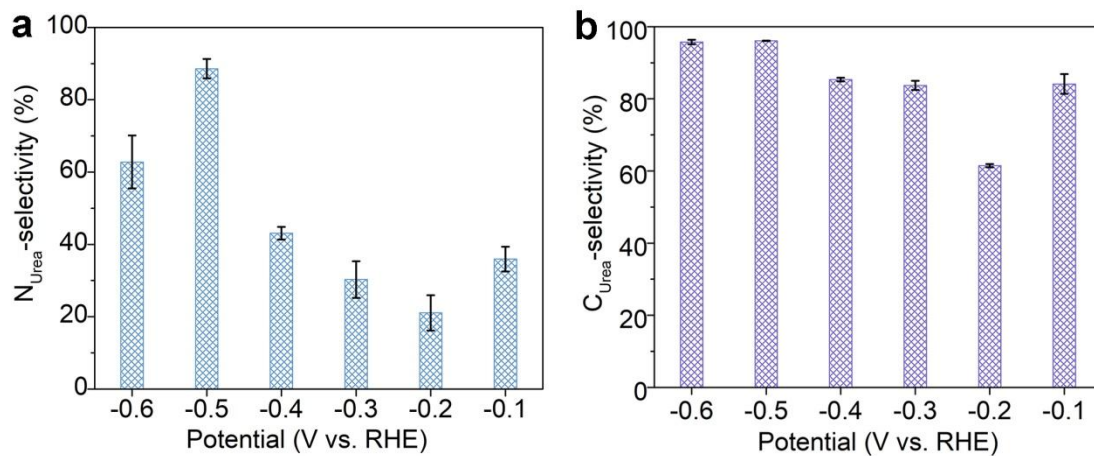

**Supplementary Fig. 18.** Potential-dependent (a)  $\text{NO}_3^-$ -to-urea and (b)  $\text{CO}_2$ -to-urea selectivity for  $\text{Pd}_4\text{Cu}_1\text{-Ni(OH)}_2$  composite sample in urea electrosynthesis. (a, b) Error bars in accordance with the standard deviation of at least three independent measurements.

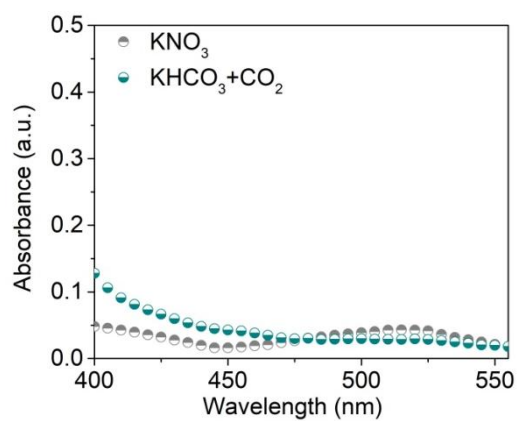

**Supplementary Fig. 19.** UV-Vis spectra of the electrolytes for Pd<sub>4</sub>Cu<sub>1</sub>-Ni(OH)<sub>2</sub> in the mixture of KNO<sub>3</sub> or KHCO<sub>3</sub> and CO<sub>2</sub>.

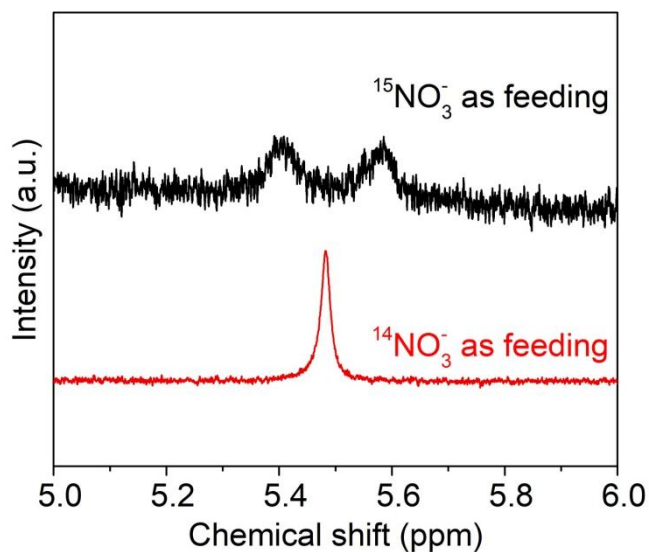

**Supplementary Fig. 20.**  $^{15}\text{N}$  isotope labeling experiments using  $^{15}\text{NO}_3^-$  (100 mM) and  $^{14}\text{NO}_3^-$  as N feeding in electrochemical C–N coupling toward urea production.

**Notes:** To confirm the produced urea rooted from the electrochemical C–N coupling from  $\text{CO}_2$  and  $\text{NO}_3^-$ , we acquired UV-Vis absorption curves for  $\text{Pd}_4\text{Cu}_1\text{-Ni(OH)}_2$  recorded in solo  $\text{KNO}_3$  or  $\text{KHCO}_3 + \text{CO}_2$  at  $-0.5$  V, which indicates no urea formation (Supplementary Fig. 19). Furthermore,  $^{15}\text{N}$  isotope labeling experiments were carried out (Supplementary Fig. 20).  $^1\text{H-NMR}$  spectra indicate that a single peak located at 5.5 ppm using  $^{14}\text{NO}_3^-$  as N-source. When feeding  $^{15}\text{NO}_3^-$  as N-source, a double peak is observed, which is the characteristic peak of  $\text{CO}(^{15}\text{NH}_2)_2$ .<sup>[S3]</sup> All the results verify that urea is really obtained from electrochemical C–N coupling from  $\text{CO}_2$  and  $\text{NO}_3^-$ .

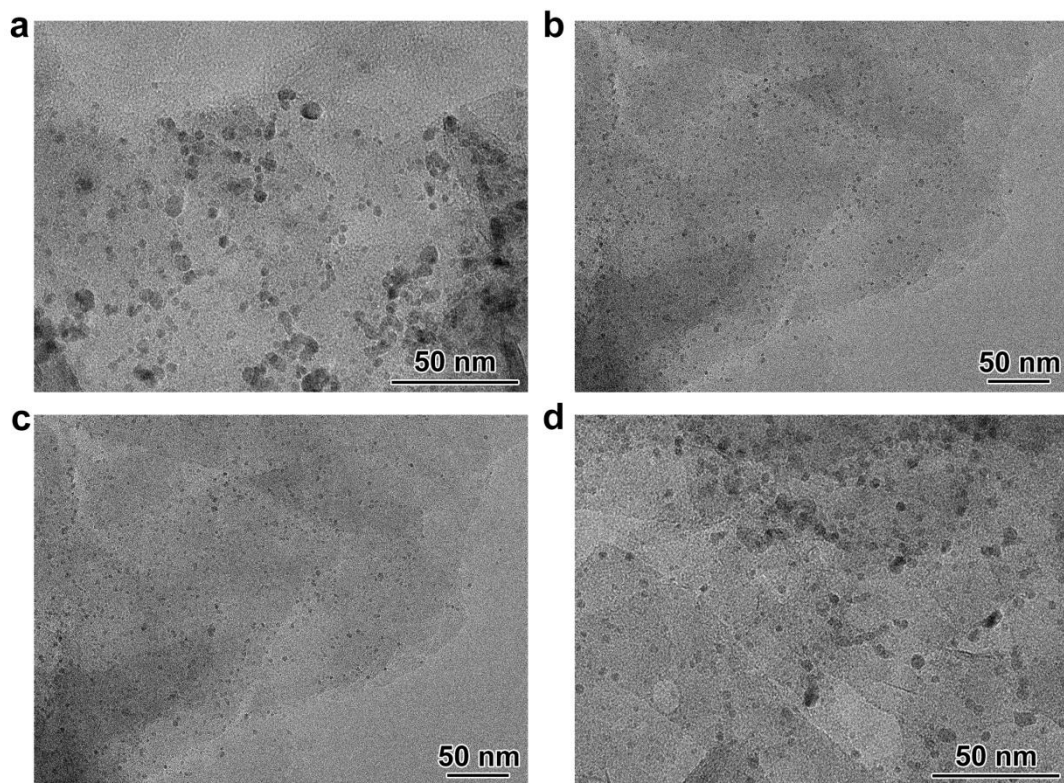

**Supplementary Fig. 21.** TEM images of (a) Pd<sub>4</sub>Fe<sub>1</sub>-Ni(OH)<sub>2</sub>, (b) Pd<sub>4</sub>Co<sub>1</sub>-Ni(OH)<sub>2</sub>, (c) Pd<sub>4</sub>Ni<sub>1</sub>-Ni(OH)<sub>2</sub>, (d) Pd<sub>4</sub>Zn<sub>1</sub>-Ni(OH)<sub>2</sub>.

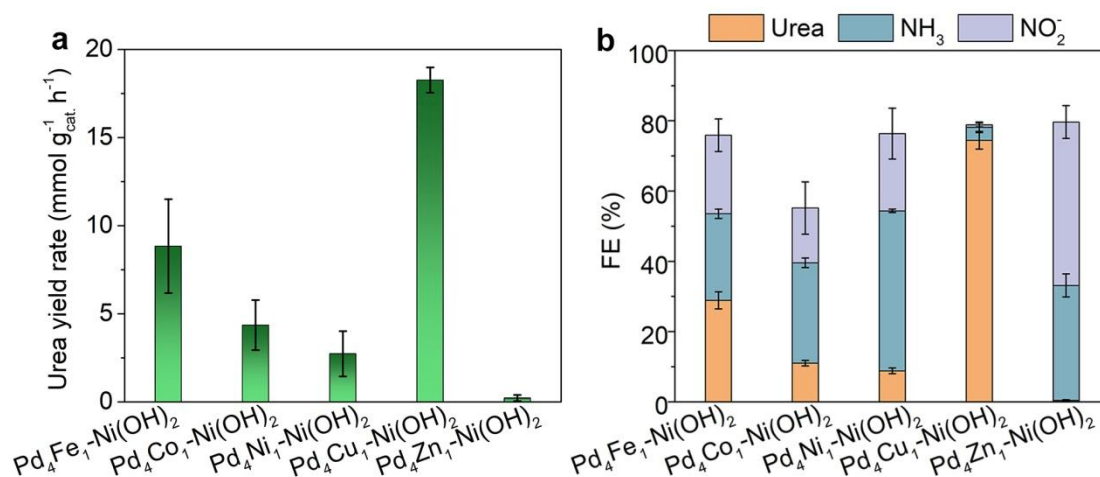

**Supplementary Fig. 22.** Screening of metal types (Fe, Co, Ni, Cu, Zn) in electrochemical C–N coupling: (a) Urea yield rate and (b) FE. (a, b) Error bars in accordance with the standard deviation of at least three independent measurements.

**Notes:** In order to screen the optimal transition metals single-atom alloys, we chose typical transition metals, i.e., Fe, Co, Ni, Cu, Zn. As shown in Supplementary Fig. 22, urea yield rates are arranged as follows: Pd<sub>4</sub>Cu<sub>1</sub>-Ni(OH)<sub>2</sub> > Pd<sub>4</sub>Fe<sub>1</sub>-Ni(OH)<sub>2</sub> > Pd<sub>4</sub>Co<sub>1</sub>-Ni(OH)<sub>2</sub> > Pd<sub>4</sub>Ni<sub>1</sub>-Ni(OH)<sub>2</sub> > Pd<sub>4</sub>Zn<sub>1</sub>-Ni(OH)<sub>2</sub>. Urea FEs for Pd<sub>4</sub>X<sub>1</sub>-Ni(OH)<sub>2</sub> samples show a similar trend with urea yield rates. The results suggest the best choice of Cu single-atom alloy in urea electrosynthesis. Notably, the process of NO<sub>2</sub><sup>-</sup> to \*NH<sub>2</sub> is inhibited on Zn single-atom alloy and no urea is formed.



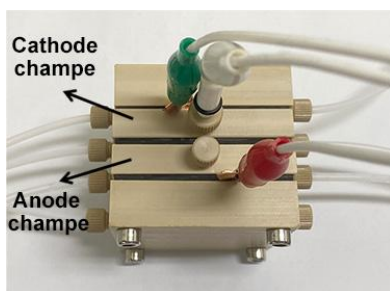

**Supplementary Fig. 23.** Photograph of an actual GDE for urea electrosynthesis.

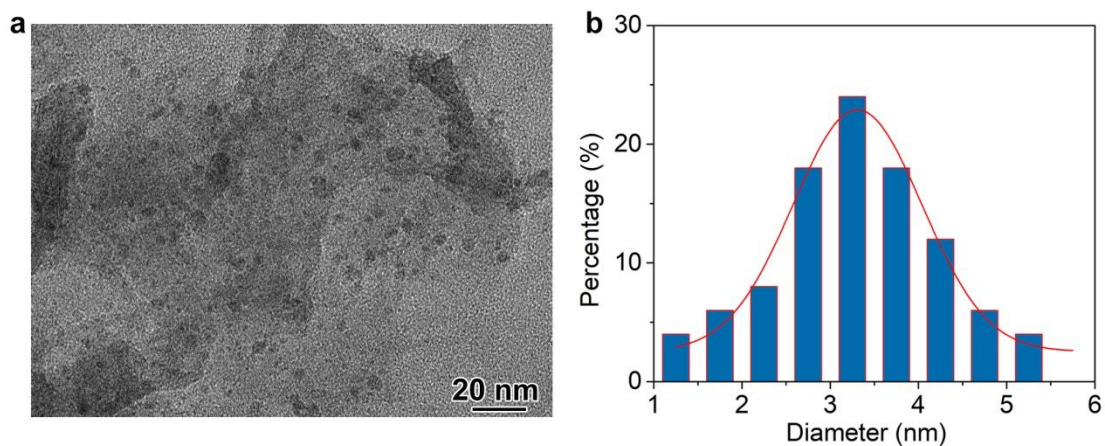

**Supplementary Fig. 24.** TEM image of Pd<sub>4</sub>Cu<sub>1</sub>-Ni(OH)<sub>2</sub> after durability test, (b) the particle size distribution diagram of Pd<sub>4</sub>Cu<sub>1</sub> clusters after durability test.

**Notes:** Supplementary Fig. 24a shows the TEM image of Pd<sub>4</sub>Cu<sub>1</sub>-Ni(OH)<sub>2</sub> sample after 100 h of durability test in H-type cell. Pd<sub>4</sub>Cu<sub>1</sub> still displays cluster structure with size of  $3.3 \pm 0.9$  nm (Supplementary Fig. 24b), suggesting the rigidity of the composite catalyst.

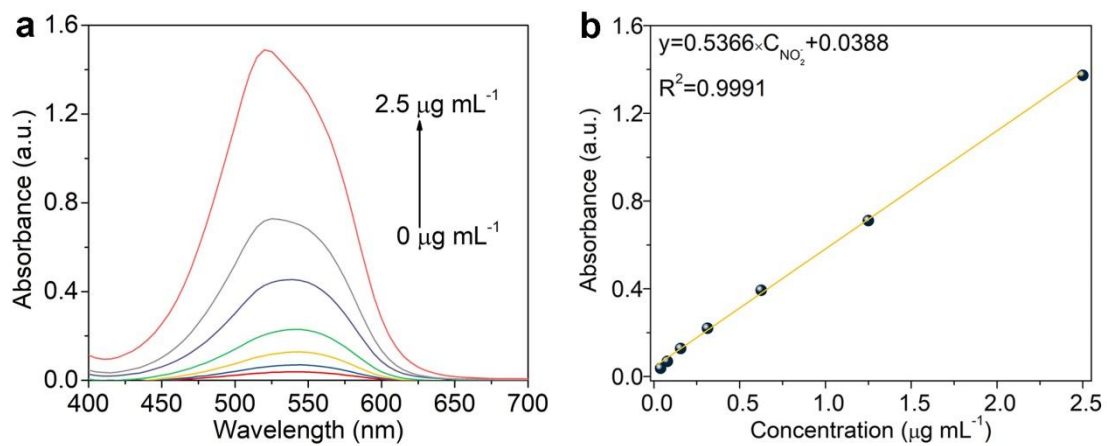

**Supplementary Fig. 25.** (a) UV-Vis curves of Griess's reagent with varied concentrations of  $\text{NO}_2^-$  at room temperature for 15 min. (b) Calibration curve used for estimation of  $\text{NO}_2^-$ .

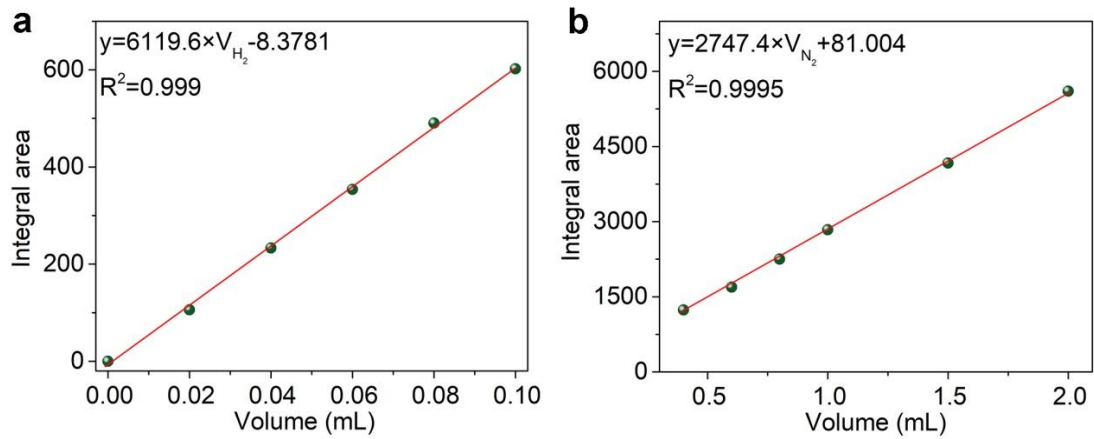

**Supplementary Fig. 26.** Calibration curves used for estimation of (a) H<sub>2</sub> and (b) N<sub>2</sub>.

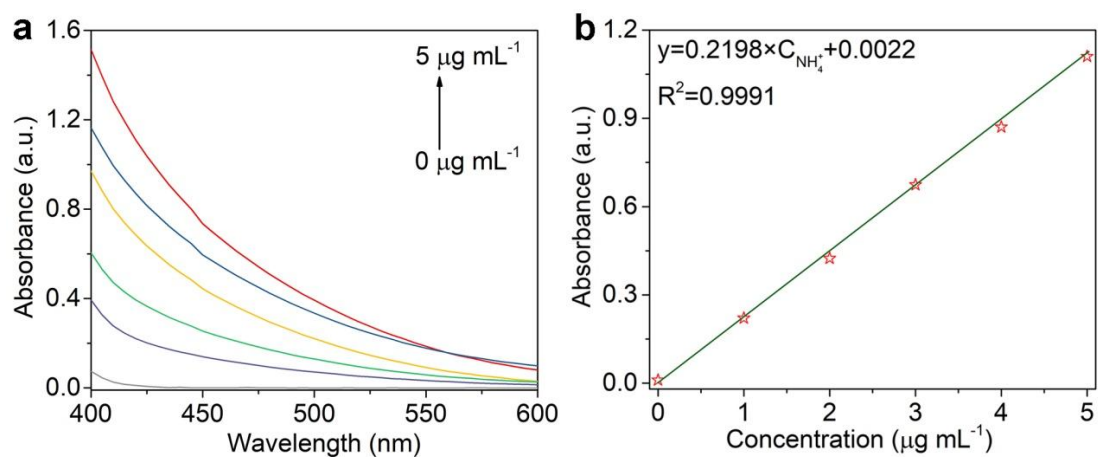

**Supplementary Fig. 27.** (a) UV-Vis curves of Nessler's agent assays with varied concentrations of  $\text{NH}_4^+$ . (b) Calibration curve used for the estimation of  $\text{NH}_4^+$ .

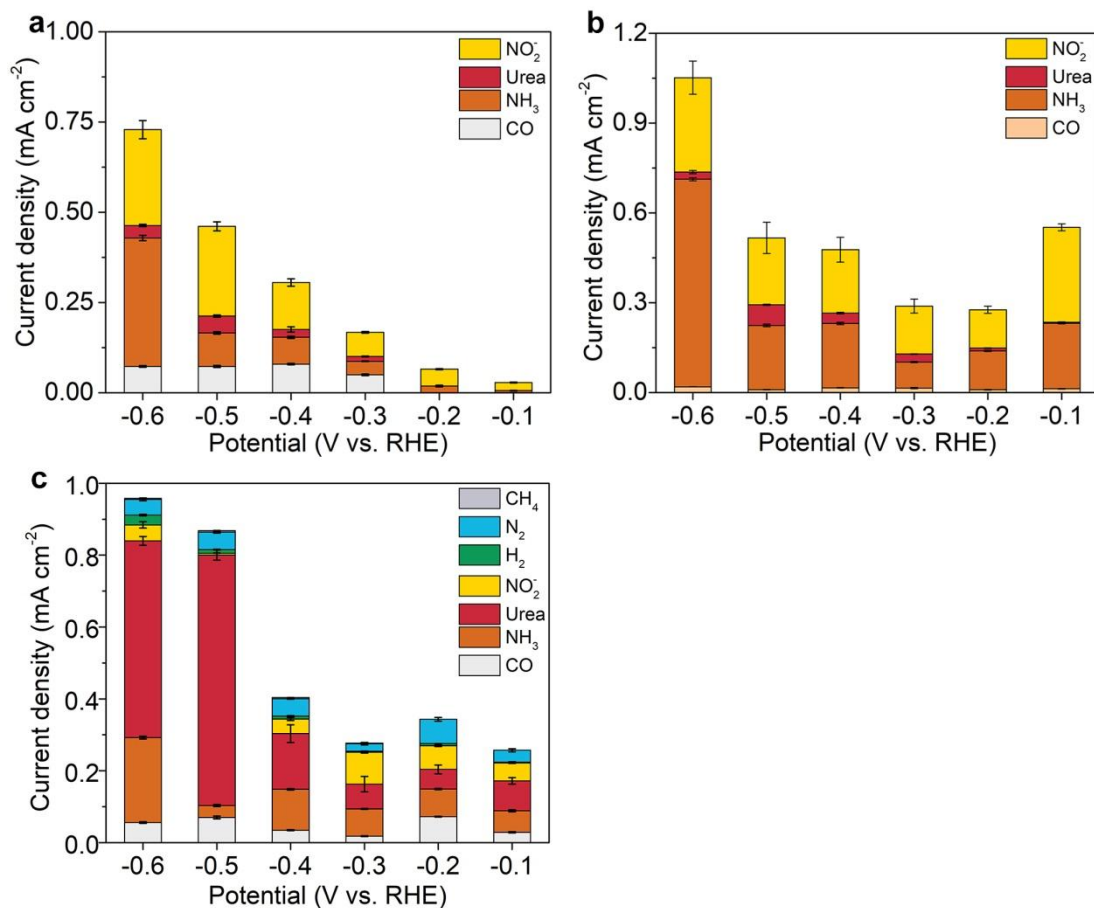

**Supplementary Fig. 28.** Partial current densities of the possible by-products for (a) Pd-Ni(OH)<sub>2</sub>, (b) Pd<sub>1</sub>Cu<sub>1</sub>-Ni(OH)<sub>2</sub>, (c) Pd<sub>4</sub>Cu<sub>1</sub>-Ni(OH)<sub>2</sub>. (a-c) Error bars in accordance with the standard deviation of at least three independent measurements.

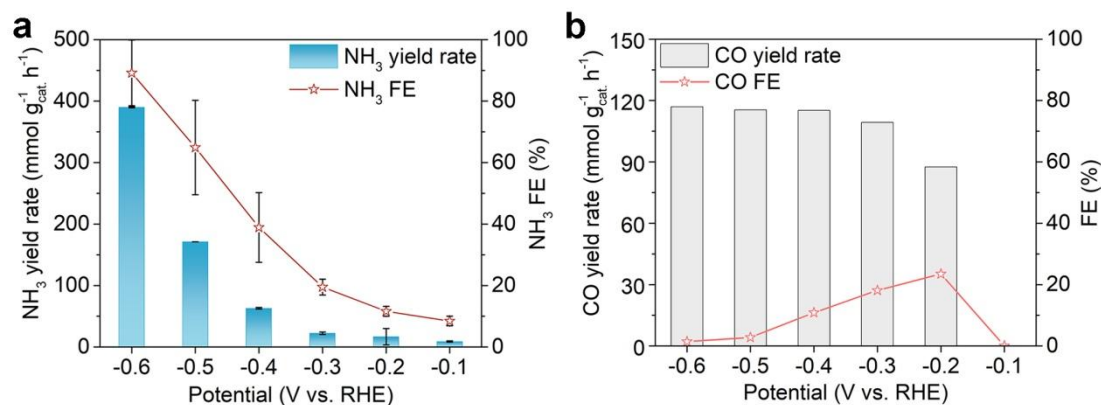

**Supplementary Fig. 29.** (a) Evaluation of NO<sub>3</sub>RR performance in 0.1 M KNO<sub>3</sub> and (b) CO<sub>2</sub>RR performance in 0.1 M KHCO<sub>3</sub> solution with continuous CO<sub>2</sub> flow using Pd<sub>4</sub>Cu<sub>1</sub>-Ni(OH)<sub>2</sub> sample as a catalyst in H-type cell. (a) Error bars in accordance with the standard deviation of at least three independent measurements.

**Notes:** Electrochemical NO<sub>3</sub>RR performance was assessed in 0.1 M KNO<sub>3</sub> solution (Supplementary Fig. 29a). Ammonia yield rates increase from 9.0, 16.7, 22.4, 62.9, 171.0 to 390.0 mmol g<sub>cat.</sub><sup>-1</sup> h<sup>-1</sup> as the applied potential negatively shifts from -0.1 to -0.6 V. Accordingly, ammonia FEs increase from 8.5%, 11.6%, 19.5%, 38.9%, 64.9% to 89.2%. Supplementary Fig. 29b shows potential-dependent CO<sub>2</sub>RR performance in H-type cell. CO is the main product in CO<sub>2</sub>RR for Pd<sub>4</sub>Cu<sub>1</sub>-Ni(OH)<sub>2</sub>. The yield rates of CO are 0, 87.6, 109.4, 115.2, 115.4, 117.0 mmol g<sub>cat.</sub><sup>-1</sup> h<sup>-1</sup> at -0.1, -0.2, -0.3, -0.4, -0.5 and -0.6 V, respectively. The optimal CO FE of 23.5% was achieved at -0.2 V. (a) Error bars in accordance with the standard deviation of at least three independent measurements

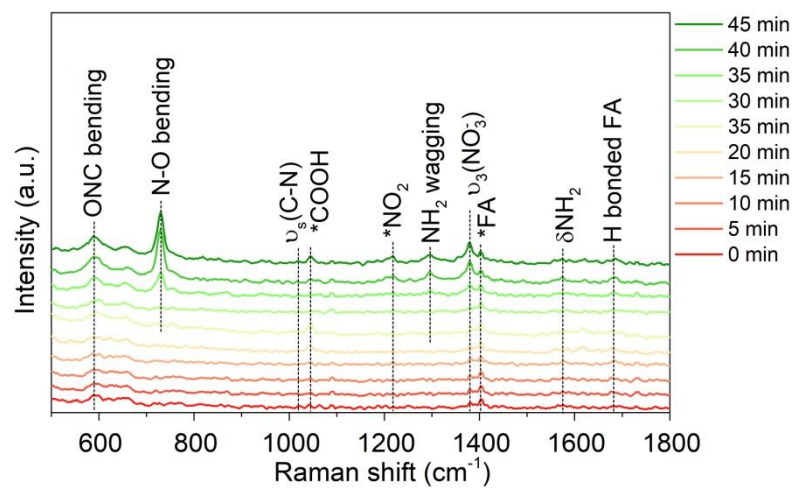

**Supplementary Fig. 30.** In-situ Raman spectra recorded in urea electrosynthesis at  $-0.5$  V from 0 to 45 min for  $\text{Pd}_1\text{Cu}_1\text{-Ni}(\text{OH})_2$ .



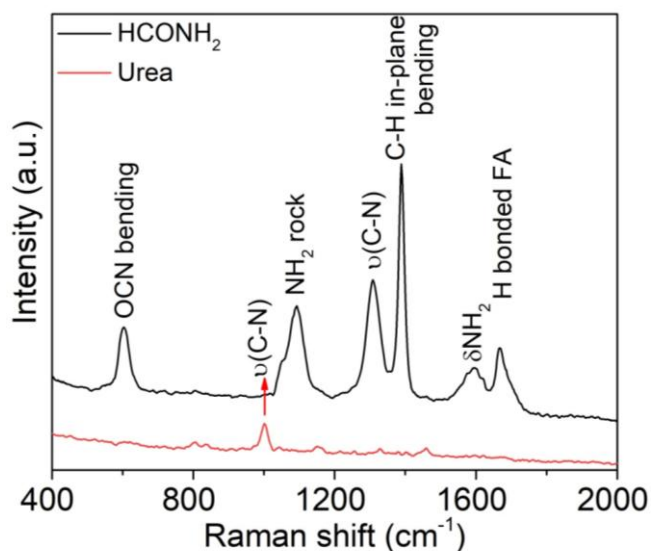

**Supplementary Fig. 31.** Raman spectra of HCONH<sub>2</sub> (FA) and urea standards with same concentrations dissolved in the mixture of KNO<sub>3</sub> and KHCO<sub>3</sub>.

**Notes:** Supplementary Fig. 31 shows the Raman spectra of urea and HCONH<sub>2</sub> dissolved in the mixture of KNO<sub>3</sub> and KHCO<sub>3</sub>. The peak located at 1000 cm<sup>-1</sup> is the characteristic  $\nu_s(\text{C-N})$  mode of urea. As shown in Supplementary Table 4, the peaks located at 602, 1091, 1308, 1390, 1598, 1668 cm<sup>-1</sup> are assigned to OCN bending, NH<sub>2</sub> rock,  $\nu(\text{C-N})$ , C-H in-plane bending,  $\delta\text{NH}_2$  modes and H bonded formamide, respectively. It should be noted that formamide displays stronger Raman signal than urea.

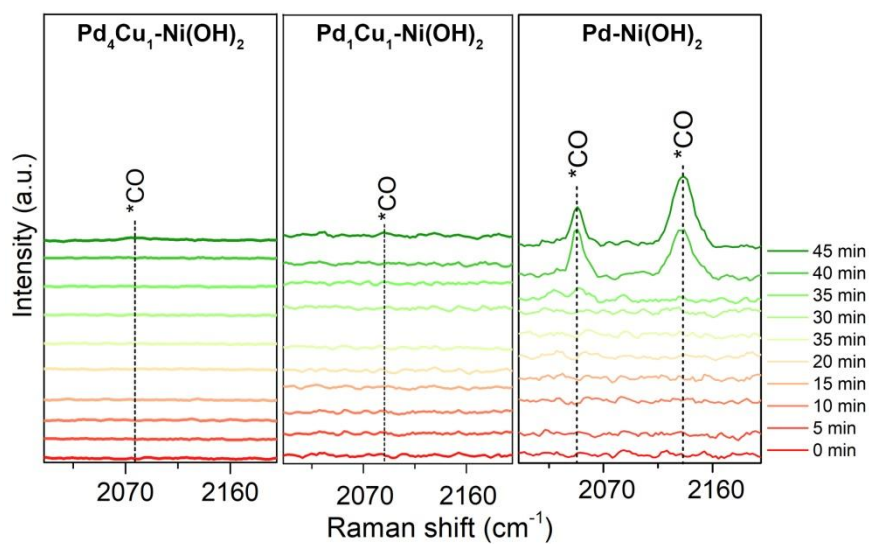

**Supplementary Fig. 32.** In-situ Raman spectra to trace \*CO evolution on Pd-Ni(OH)<sub>2</sub>, Pd<sub>1</sub>Cu<sub>1</sub>-Ni(OH)<sub>2</sub> and Pd<sub>4</sub>Cu<sub>1</sub>-Ni(OH)<sub>2</sub> at -0.5 V.

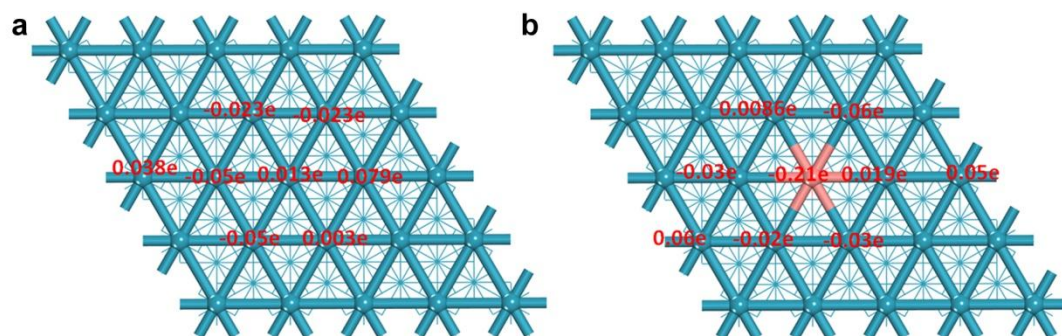

**Supplementary Fig. 33.** Bader charge analysis of (a) Pd(111) and (b) Cu<sub>1</sub>Pd(111) slabs.

Top view

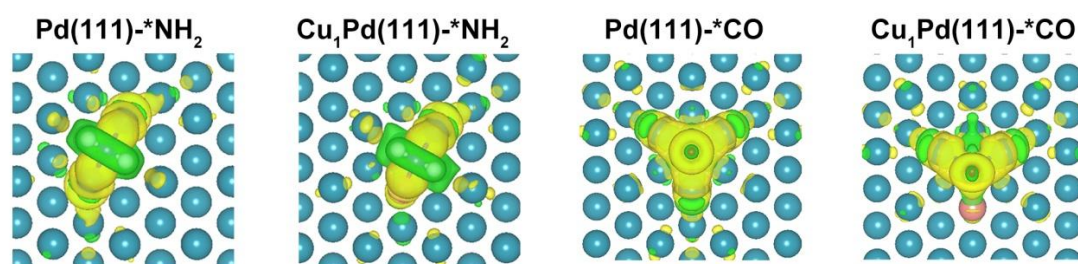

Side view

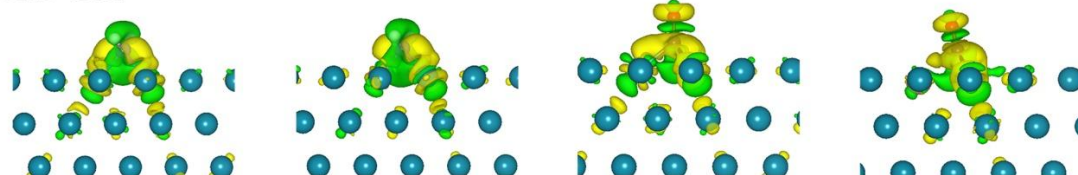

**Supplementary Fig. 34.** Top view (top) and side views (down) of differential charge densities of Cu<sub>1</sub>Pd(111)-\*NH<sub>2</sub>, Pd(111)-\*NH<sub>2</sub>, Cu<sub>1</sub>Pd(111)-\*CO, Pd(111)-\*CO.

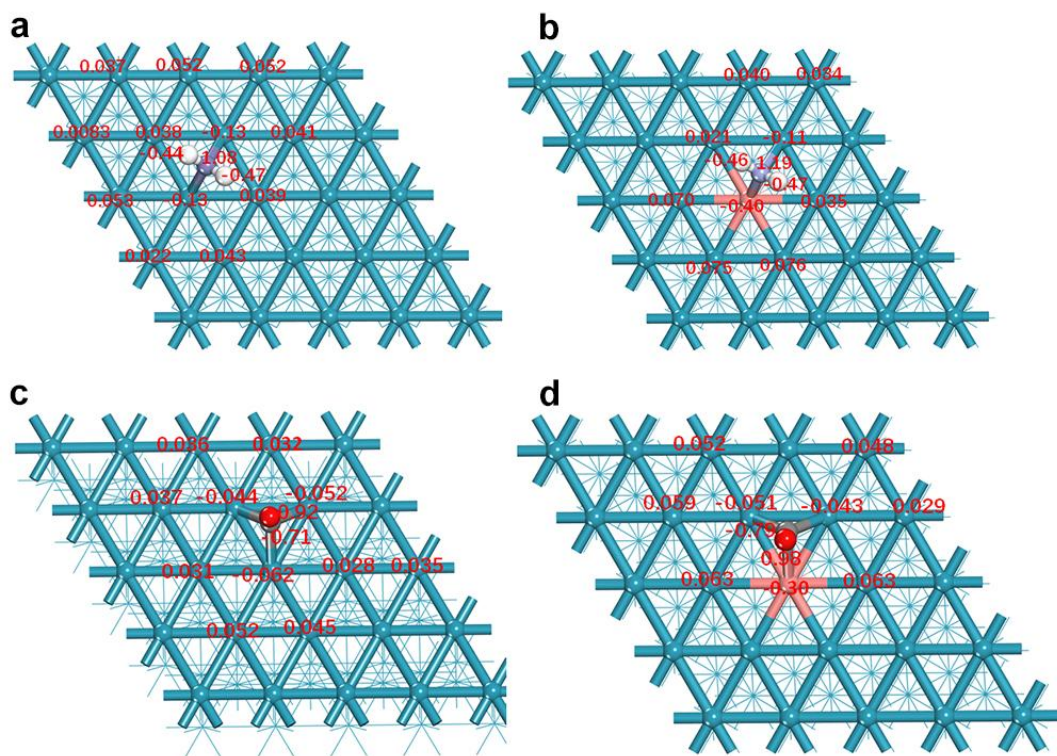

**Supplementary Fig. 35.** Bader charge analysis of the two main intermediate species ( $\ast\text{CO}$  and  $\ast\text{NH}_2$ ) on Pd(111) and  $\text{Cu}_1\text{Pd}(111)$  surfaces: (a) Pd(111)- $\ast\text{NH}_2$ , (b)  $\text{Cu}_1\text{Pd}(111)$ - $\ast\text{NH}_2$ , (c) Pd(111)- $\ast\text{CO}$ , (d)  $\text{Cu}_1\text{Pd}(111)$ - $\ast\text{CO}$ .

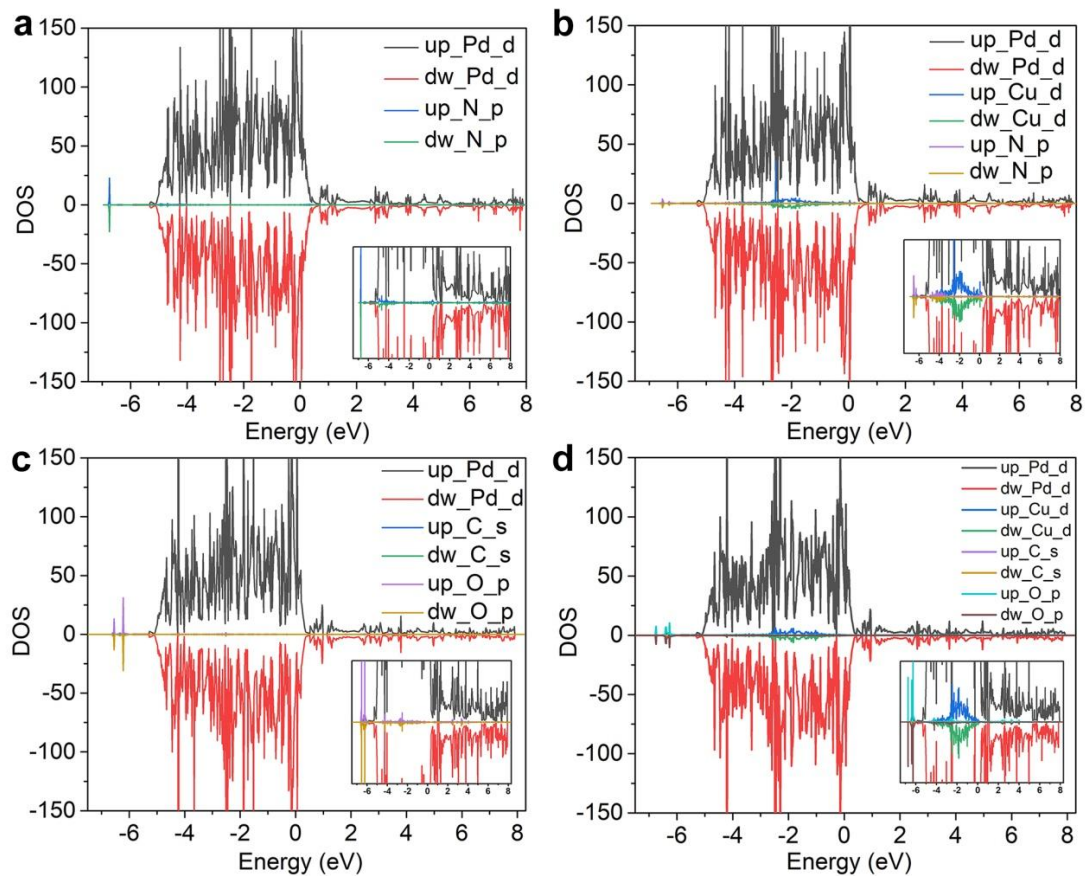

**Supplementary Fig. 36.** Projected electronic densities of states of the Pd d and Cu d orbitals on Pd(111) and Cu<sub>1</sub>Pd(111), and those of the Pd d, Cu d, C s, N p and O p orbitals on Cu<sub>1</sub>Pd(111) surfaces.

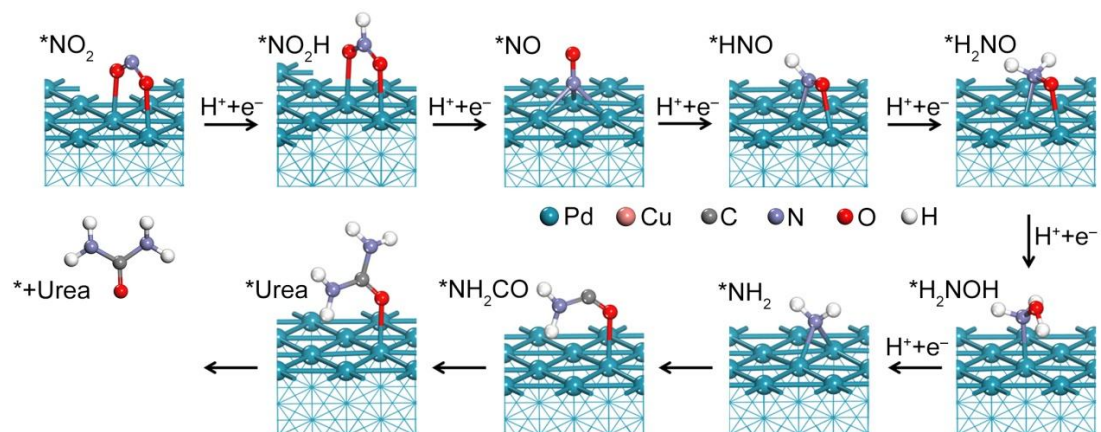

**Supplementary Fig. 37.** DFT-calculated urea formation cycle on Pd(111) surface.

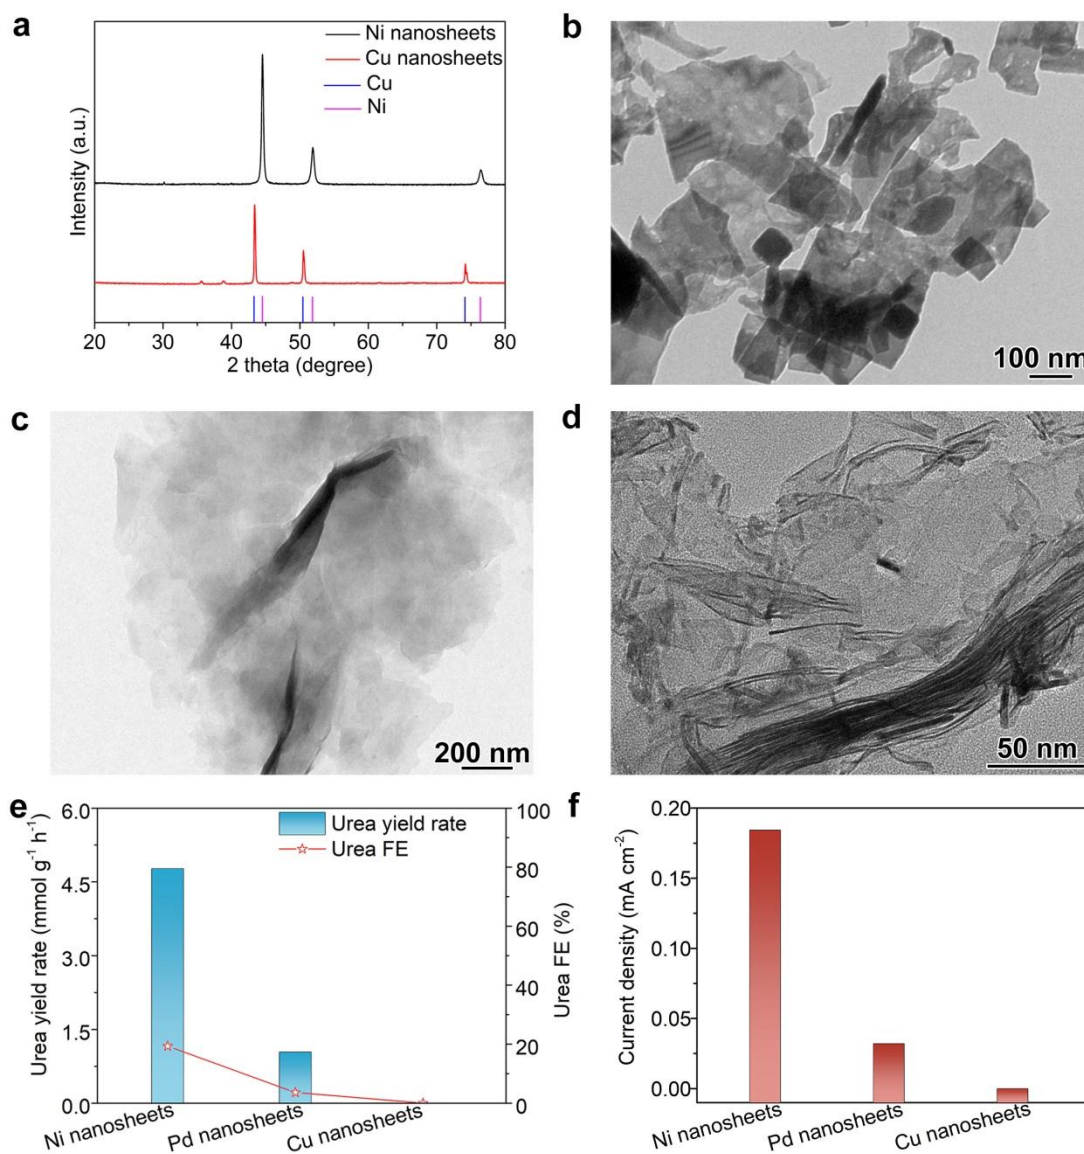

**Supplementary Fig. 38.** (a) XRD patterns of Cu nanosheets and Ni nanosheets. TEM images of (b) Cu nanosheets, (c) Ni nanosheets and (d) Pd nanosheets. (e) Urea yield rates and urea FEs, (f) urea partial current density.

**Notes:** Ni nanosheets, Pd nanosheets and Cu nanosheets were synthesized to make a comprehensive comparison. As shown in Supplementary Fig. 38, urea yield rates and urea FEs at  $-0.5$  V are 4.8, 1.0, 0 mmol g<sup>-1</sup> h<sup>-1</sup>, 19.3%, 3.6% and 0% for Ni nanosheets, Pd nanosheets and Cu nanosheets, respectively.



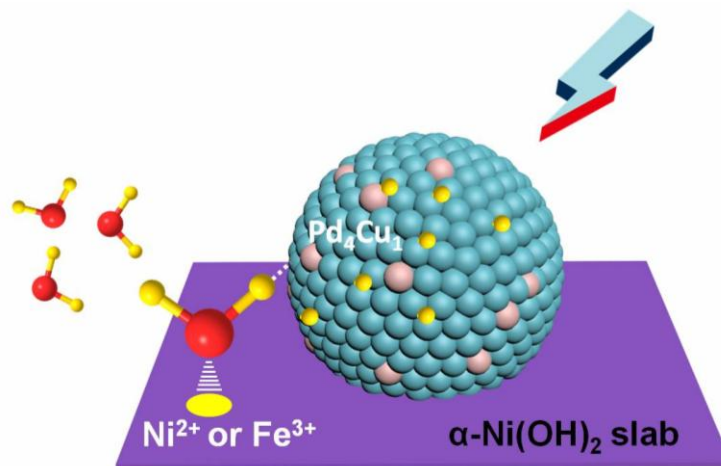

**Supplementary Fig. 39.** Schematic demonstration the promotion effect of Pd<sub>4</sub>Cu<sub>1</sub>/Ni(OH)<sub>2</sub> interface on water dissociation in alkaline media.

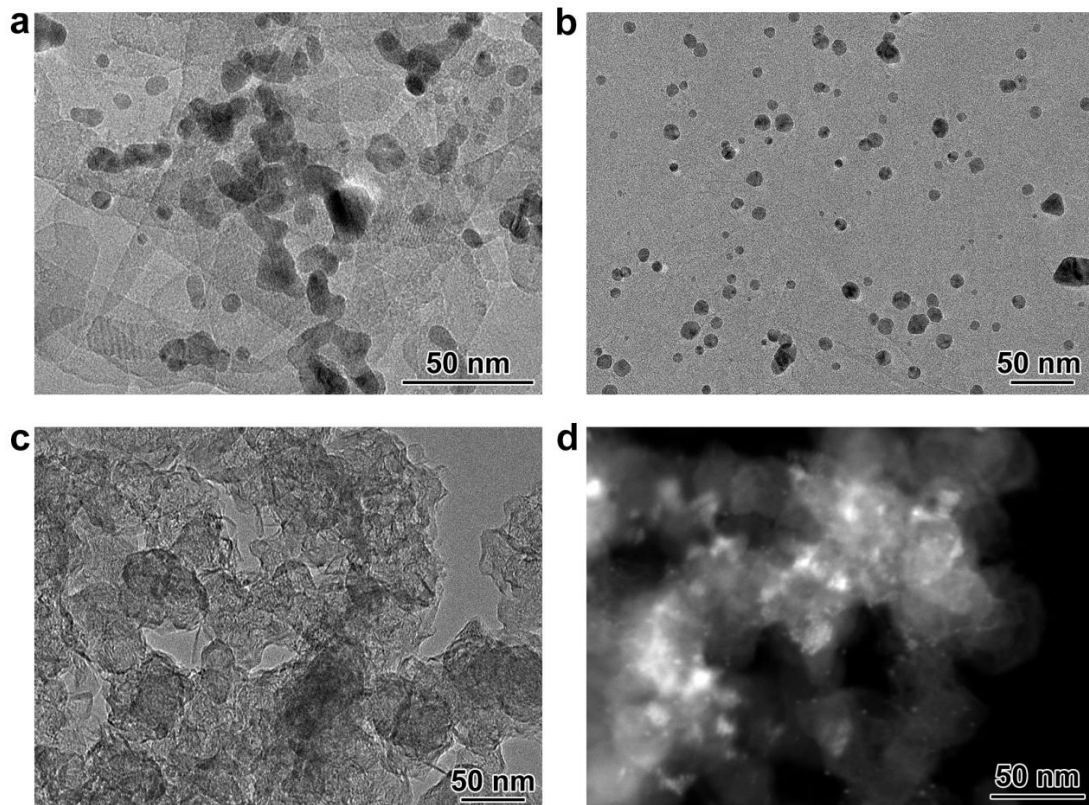

**Supplementary Fig. 40.** TEM images of (a) Pd<sub>4</sub>Cu<sub>1</sub>-TiO<sub>2</sub>, (b) Pd<sub>4</sub>Cu<sub>1</sub>-rGO, (c) Pd<sub>4</sub>Cu<sub>1</sub>-XC-72. (d) HAADF-STEM image of Pd<sub>4</sub>Cu<sub>1</sub>-XC-72.

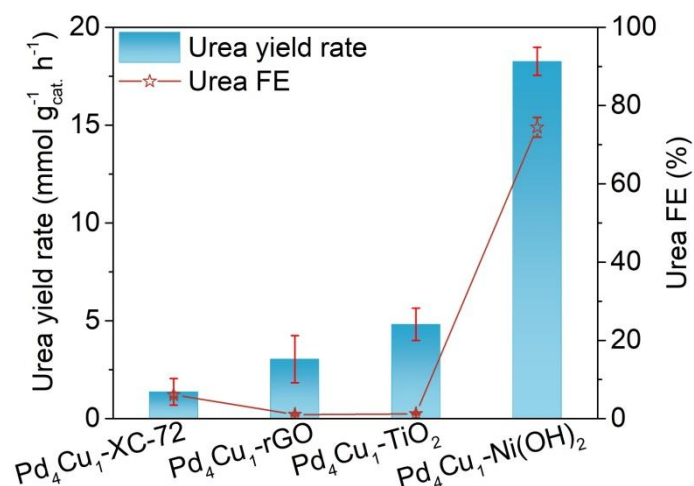

**Supplementary Fig. 41.** Urea yield rates and FEs for Pd<sub>4</sub>Cu<sub>1</sub> clusters with different carriers. Error bars in accordance with the standard deviation of at least three independent measurements.

**Notes:** Ni(OH)<sub>2</sub> nanosheets were replaced by XC-72, rGO and TiO<sub>2</sub> nanosheets to investigate the role of the carrier (Supplementary Fig. 40). As shown in Supplementary Fig. 41, urea yield rates and FEs are 1.4 and 3.0 mmol g<sub>cat.</sub><sup>-1</sup> h<sup>-1</sup>, 6.1% and 1.0% using XC-72 and rGO as carriers with good electrical conductivity. The results indicate that the conductivity of the carrier is not responsible for the high performance of urea electrosynthesis. Then, semiconductor (TiO<sub>2</sub> nanosheets) were employed as carrier, urea yield rate and FE are still lower than that of Ni(OH)<sub>2</sub>, suggesting the unique role of Pd<sub>4</sub>Cu<sub>1</sub>/Ni(OH)<sub>2</sub> interface on urea electrosynthesis.

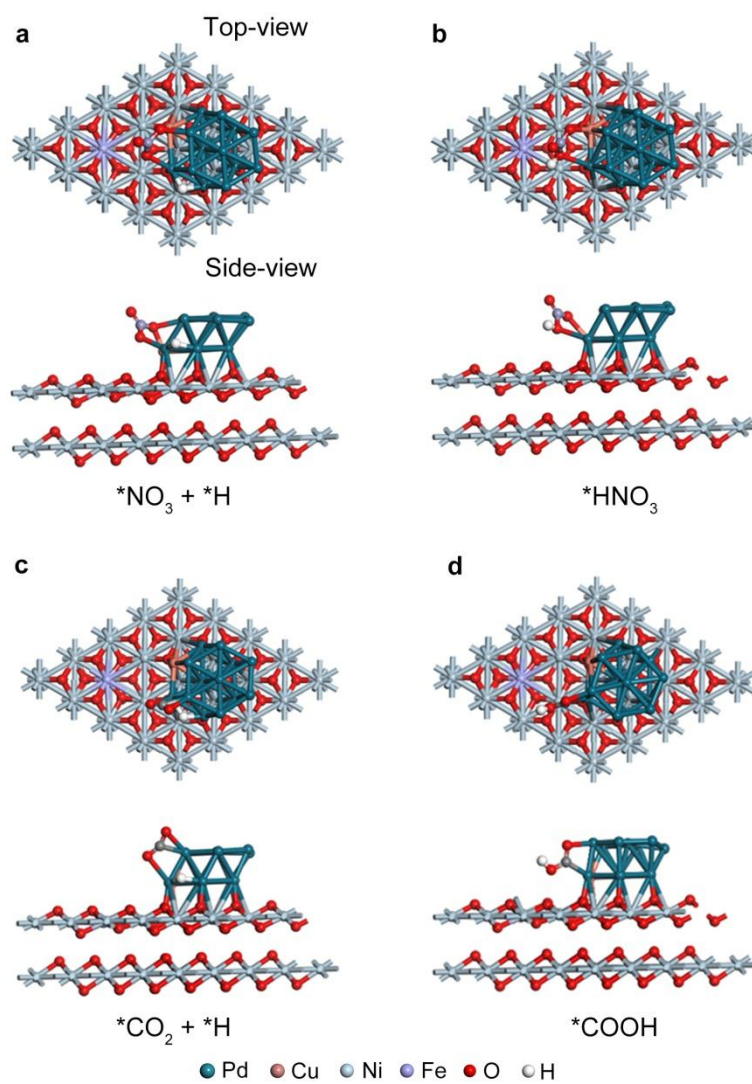

**Supplementary Fig. 42.** Adsorption configurations of (a)  $*NO_3 + *H$ , (b)  $*HNO_3$ , (c)  $*CO_2 + *H$  and (d)  $*COOH$  on  $Cu_1Pd-FeNi(OH)_2$ .

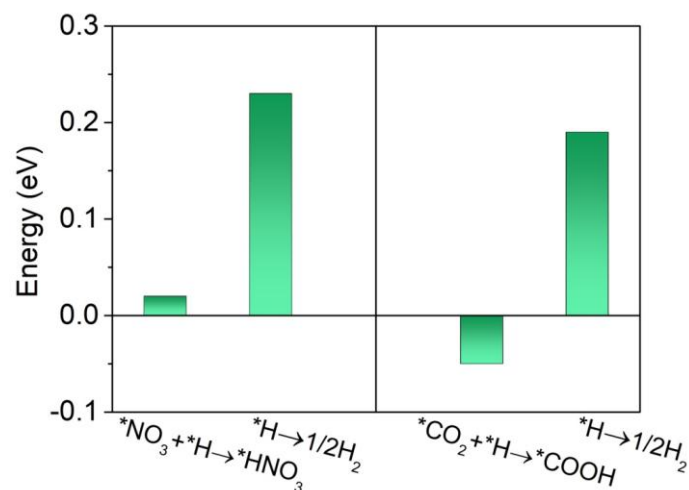

**Supplementary Fig. 43.** The energy barriers of H–H coupling to form H<sub>2</sub> or the hydrogenation of \*NO<sub>3</sub> and \*CO<sub>2</sub> to form \*HNO<sub>3</sub> and \*COOH.

**Notes:** In view of the enhanced the dissociation of H–OH bond, we then calculated the energy barriers of H–H coupling to form H<sub>2</sub> and the hydrogenation of \*NO<sub>3</sub> and \*CO<sub>2</sub> processes in the co-existence of \*H, \*NO<sub>3</sub> and \*CO<sub>2</sub>. As shown in Supplementary Fig. 42, 43, the energy barriers are 0.23 eV for H–H coupling to release H<sub>2</sub> and 0.02 eV for \*NO<sub>3</sub>+\*H→\*HNO<sub>3</sub> process in the co-existence of \*H and \*NO<sub>3</sub>, suggesting that the produced active H atoms tend to add to adjacent \*NO<sub>3</sub>, instead of H<sub>2</sub> evolution, which guarantees high urea FE. Similarly, active \*H atoms tend to add to adjacent \*CO<sub>2</sub> to trigger CO<sub>2</sub>RR in the co-existence of \*H and \*CO<sub>2</sub>.

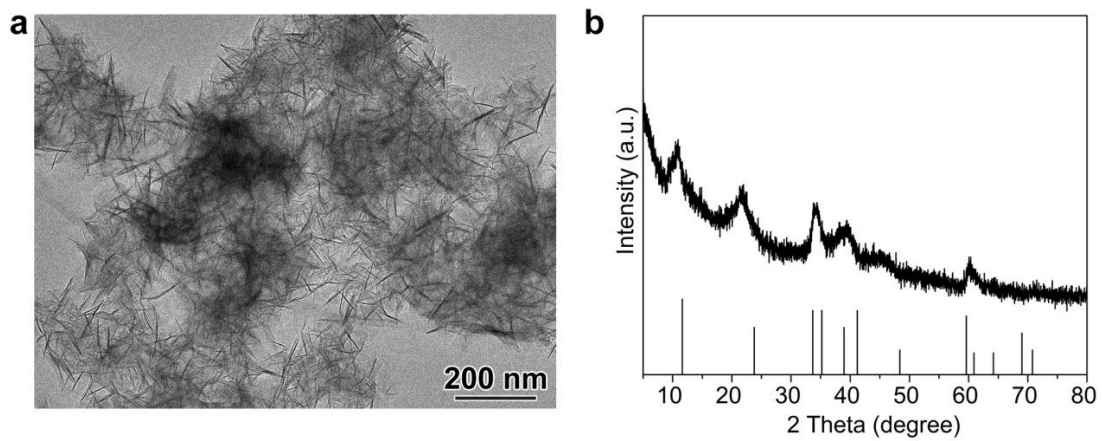

**Supplementary Fig. 44.** (a) TEM image of Fe-doped Ni(OH)<sub>2</sub> nanosheets and (b) XRD pattern of Pd<sub>4</sub>Cu<sub>1</sub>-FeNi(OH)<sub>2</sub>.

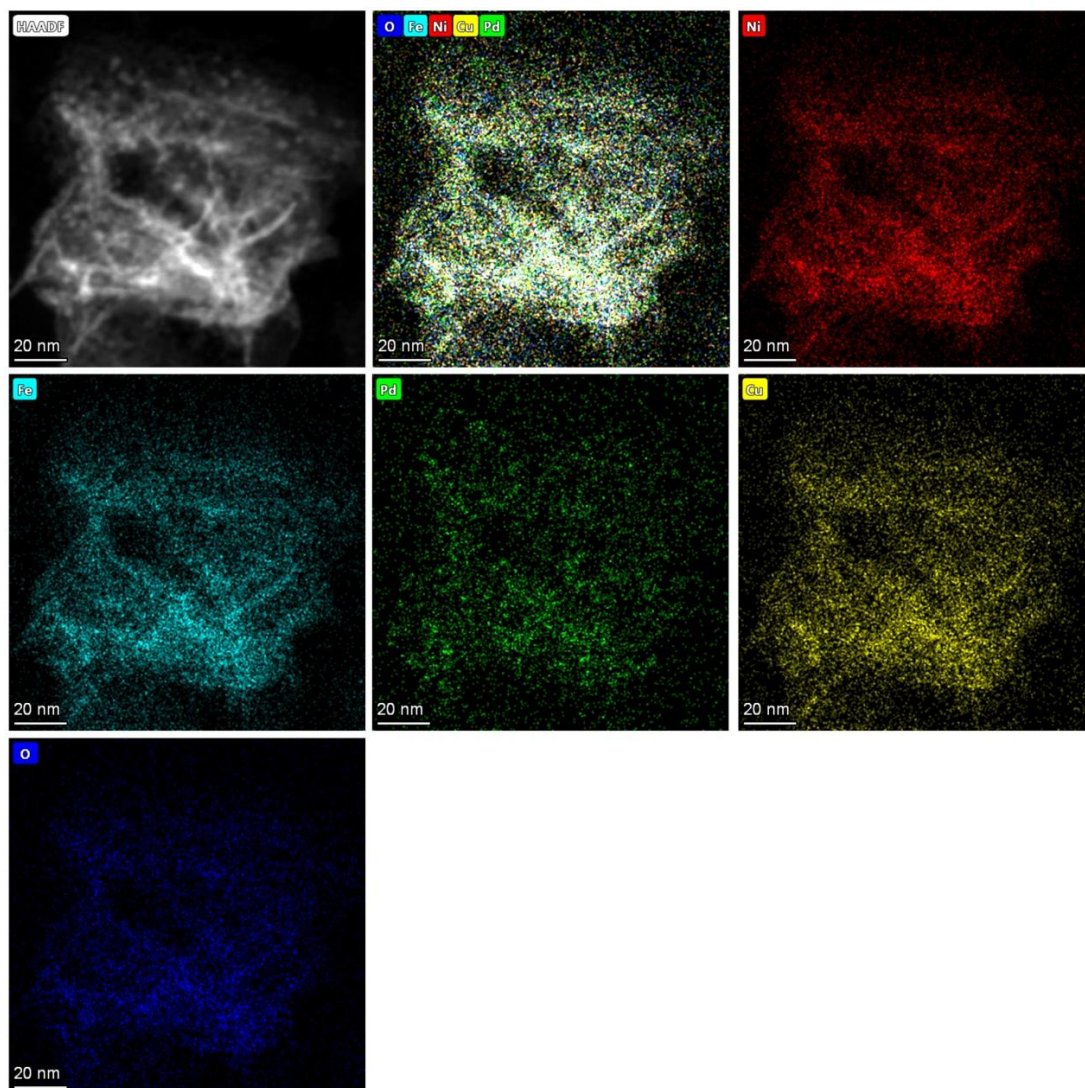

**Supplementary Fig. 45.** Elemental mapping profiles of  $\text{Pd}_4\text{Cu}_1\text{-FeNi(OH)}_2$  composite sample, Ni (red), Fe (cyan), Pd (green), Cu (yellow) and O (blue).

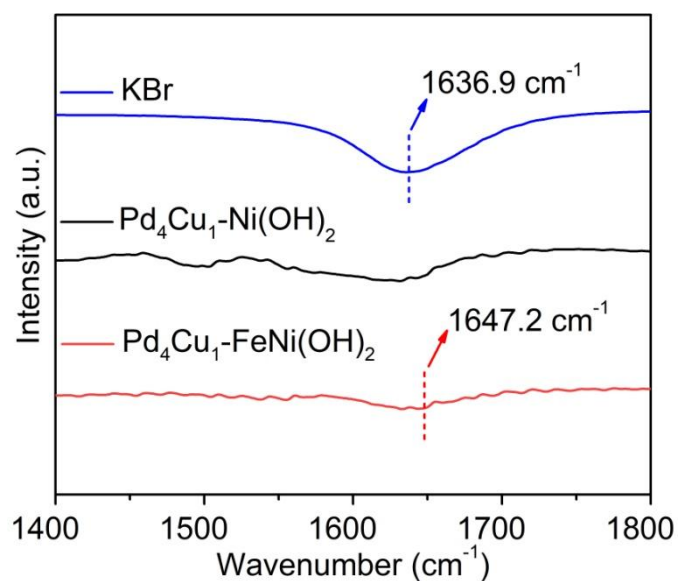

**Supplementary Fig. 46.** Infrared spectra of KBr, Pd<sub>4</sub>Cu<sub>1</sub>-Ni(OH)<sub>2</sub> and Pd<sub>4</sub>Cu<sub>1</sub>-FeNi(OH)<sub>2</sub> after trace water adsorption.

**Notes:** As H<sub>2</sub>O molecule tends to adsorb on Pd<sub>4</sub>Cu<sub>1</sub>/Ni(OH)<sub>2</sub> interface by forming Ni<sup>δ+</sup>...O<sup>2-</sup>-H...Pd<sub>4</sub>Cu<sub>1</sub> interaction, the bending mode of H-OH shifts to higher energy region. As shown in Supplementary Fig. 46, infrared spectra of adsorbed H<sub>2</sub>O on KBr, Pd<sub>4</sub>Cu<sub>1</sub>-Ni(OH)<sub>2</sub> and Pd<sub>4</sub>Cu<sub>1</sub>-FeNi(OH)<sub>2</sub> composite samples confirm this conclusion.



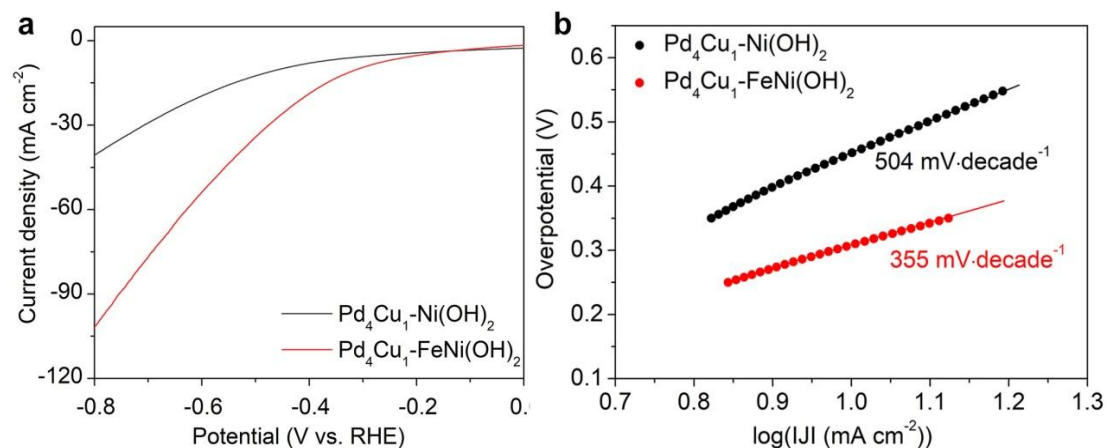

**Supplementary Fig. 47.** (a) LSV curves and (b) the corresponding Tafel plots of Pd<sub>4</sub>Cu<sub>1</sub>-Ni(OH)<sub>2</sub> and Pd<sub>4</sub>Cu<sub>1</sub>-FeNi(OH)<sub>2</sub> composite samples.

**Notes:** Supplementary Fig. 47 shows hydrogen evolution reaction (HER) of Pd<sub>4</sub>Cu<sub>1</sub>-Ni(OH)<sub>2</sub> and Pd<sub>4</sub>Cu<sub>1</sub>-FeNi(OH)<sub>2</sub> composite catalysts carried out in 0.1 M KOH. LSV curves and Tafel plots indicate that HER is really promoted by Fe<sup>3+</sup> doping in Ni(OH)<sub>2</sub> carrier.

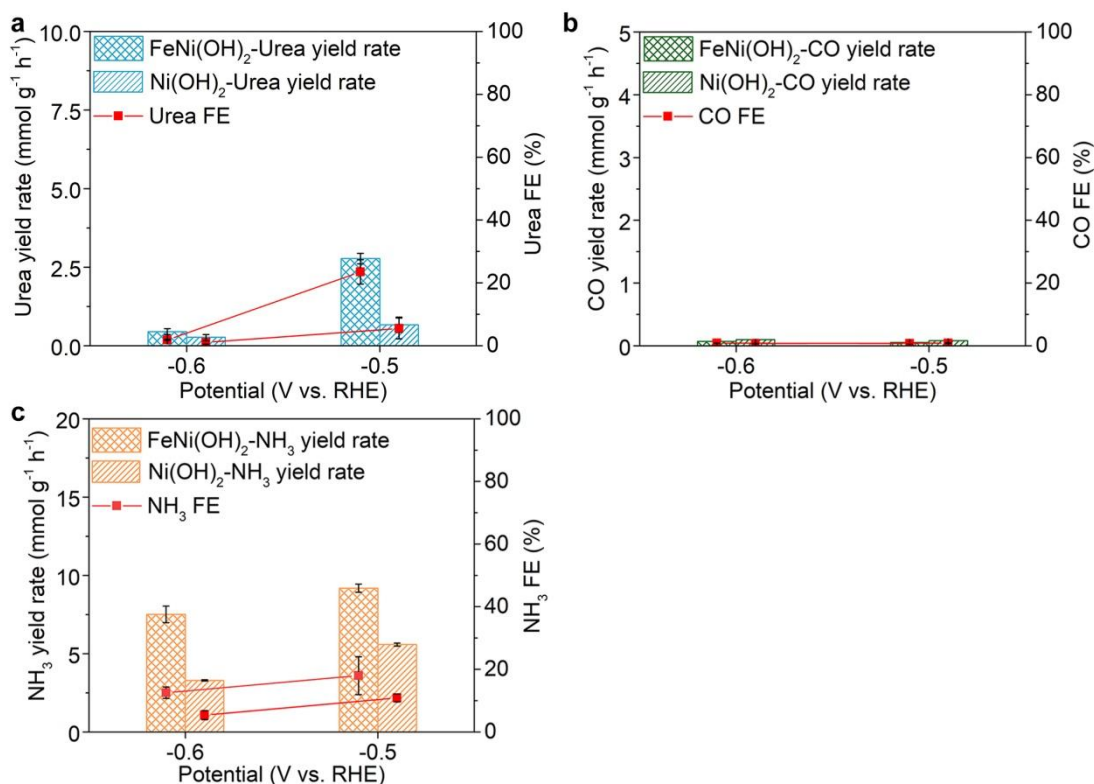

**Supplementary Fig. 48.** The comparison of FeNi(OH)<sub>2</sub> and Ni(OH)<sub>2</sub> nanosheets in (a) urea production, (b) solo CO<sub>2</sub>RR and (c) NO<sub>3</sub>RR. (a-c) Error bars in accordance with the standard deviation of at least three independent measurements.

**Notes:** In order to reveal the role of Fe doping in Ni(OH)<sub>2</sub> nanosheets on the final urea production, some control experiments were performed. As shown in Supplementary Fig. 48, urea yield rates and urea FE for FeNi(OH)<sub>2</sub> nanosheets are 2.7 mmol g<sub>cat.</sub><sup>-1</sup> h<sup>-1</sup> and 23.4% at -0.5 V, respectively. The urea yield rate and FE are comparable with that of Ni(OH)<sub>2</sub> nanosheets (0.7 mmol g<sup>-1</sup> h<sup>-1</sup>, 5.5%), much lower than that of Pd<sub>4</sub>Cu<sub>1</sub>-Ni(OH)<sub>2</sub> (18.8 mmol g<sub>cat.</sub><sup>-1</sup> h<sup>-1</sup>, 76.2%). The results indicate that Fe-doped Ni(OH)<sub>2</sub> are not the active site for electrochemical C–N coupling toward urea formation. Then, the solo NO<sub>3</sub>RR and CO<sub>2</sub>RR were also carried out (Supplementary Fig. 48b, 48c). FeNi(OH)<sub>2</sub> and Ni(OH)<sub>2</sub> nanosheets are inert for CO<sub>2</sub>RR to CO. NH<sub>3</sub> yield rate and NH<sub>3</sub> FE are all increased after Fe doping in Ni(OH)<sub>2</sub>, but still much lower than that of Pd<sub>4</sub>Cu<sub>1</sub>-Ni(OH)<sub>2</sub>, suggesting that Pd<sub>4</sub>Cu<sub>1</sub> clusters are the real active sites for CO<sub>2</sub>RR, NO<sub>3</sub>RR and C–N coupling. The results also indicate that Fe doping in Ni(OH)<sub>2</sub> has minimal impact on solo CO<sub>2</sub>RR, NO<sub>3</sub>RR, but promotes water dissociation to produce more active H atoms on Pd<sub>4</sub>Cu<sub>1</sub> surface. As such, more \*NH<sub>2</sub> and \*CO are formed on surface and then urea yield rate is greatly improved.

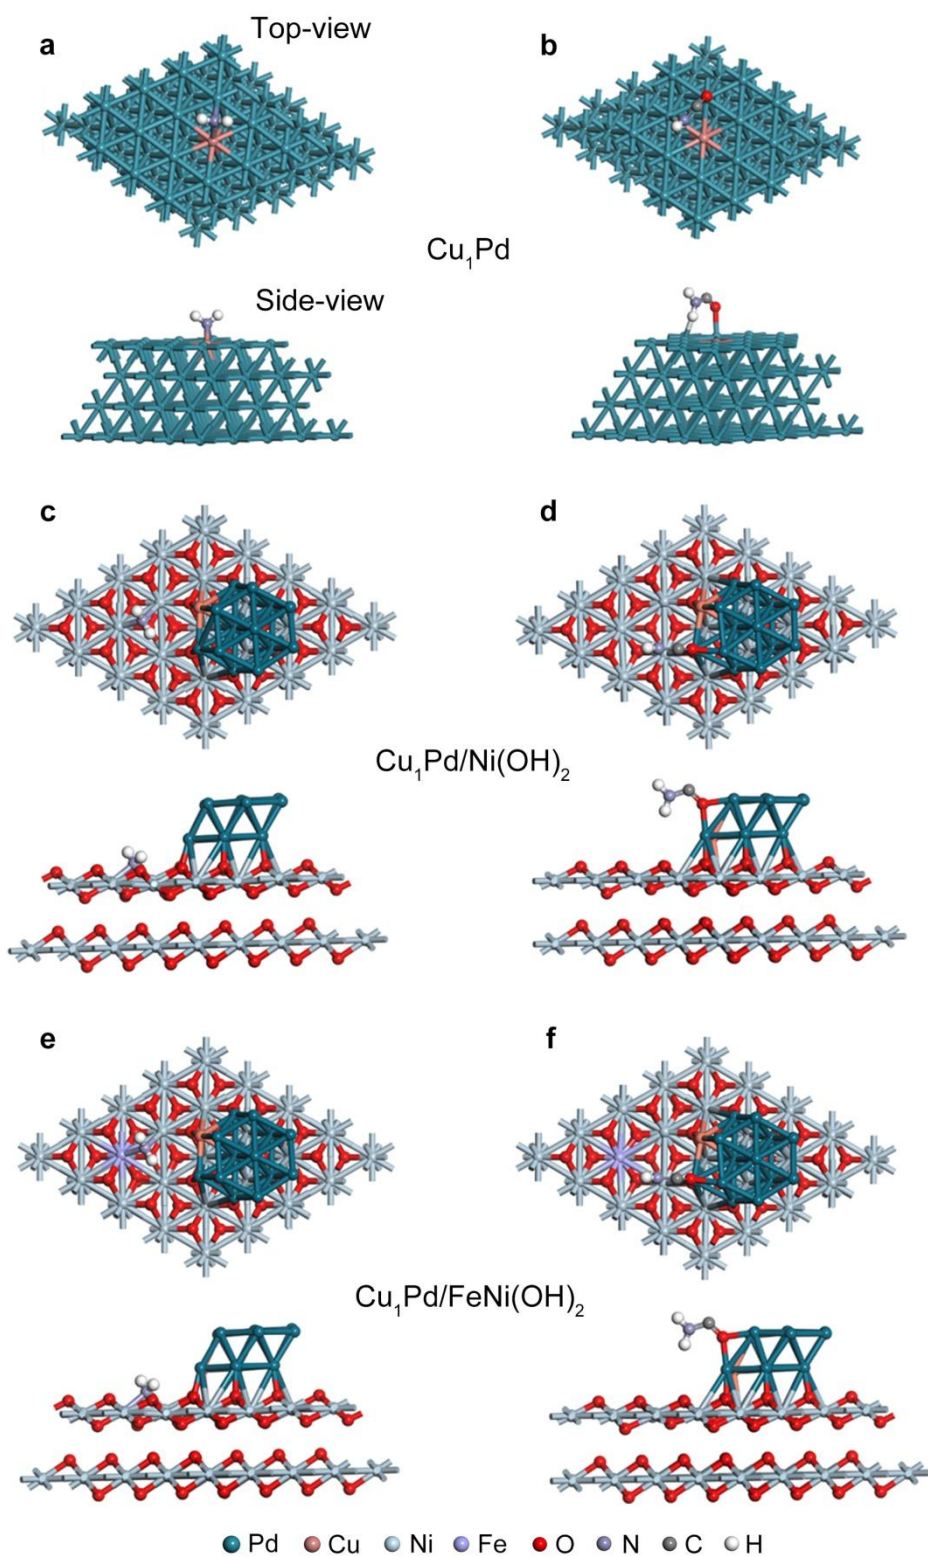

**Supplementary Fig. 49.** Adsorption configurations of the first C–N coupling of  $^*\text{NH}_2$  and  $^*\text{CO}$  to form  $^*\text{CONH}_2$  on (a,b)  $\text{Cu}_1\text{Pd}$  surface, (c,d)  $\text{Cu}_1\text{Pd}/\text{Ni}(\text{OH})_2$  and (e,f)  $\text{Cu}_1\text{Pd}/\text{FeNi}(\text{OH})_2$  interface.

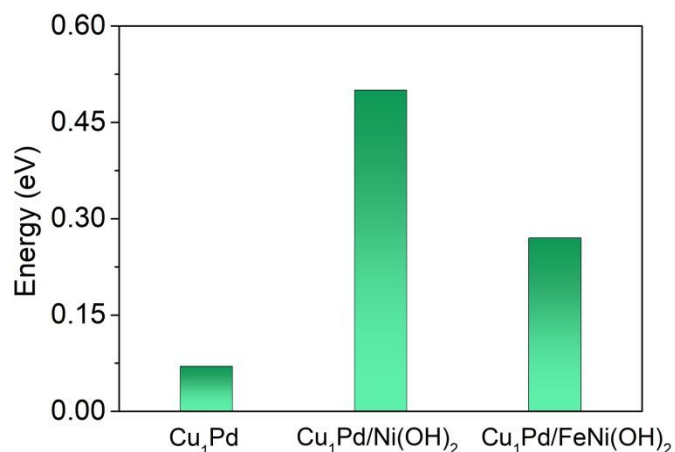

**Supplementary Fig. 50.** The energy barriers of the first C–N coupling of \*NH<sub>2</sub> and \*CO to form \*CONH<sub>2</sub> on Cu<sub>1</sub>Pd surface, Cu<sub>1</sub>Pd/Ni(OH)<sub>2</sub> and Cu<sub>1</sub>Pd/FeNi(OH)<sub>2</sub> interface.

**Notes:** To clarify whether the possibility of C–N coupling occurred on Pd<sub>4</sub>Cu<sub>1</sub>/Ni(OH)<sub>2</sub> interface as Ni(OH)<sub>2</sub> and Fe-doped Ni(OH)<sub>2</sub> have certain catalyze NO<sub>3</sub>RR ability. As such, the produced \*NH<sub>2</sub> on Ni(OH)<sub>2</sub> or FeNi(OH)<sub>2</sub> has a possibility to couple with adjacent \*CO adsorbed on Pd<sub>4</sub>Cu<sub>1</sub> surface on the interface. As shown in Supplementary Fig. 49, 50. The energy barriers for the first C–N coupling of \*NH<sub>2</sub> and \*CO to form \*CONH<sub>2</sub> on the Cu<sub>1</sub>Pd/Ni(OH)<sub>2</sub> and Cu<sub>1</sub>Pd/FeNi(OH)<sub>2</sub> interface are 0.50 and 0.27 eV, respectively, higher than that on Cu<sub>1</sub>Pd surface (0.07 eV). The result indicates that C–N coupling tends to occur on Pd<sub>4</sub>Cu<sub>1</sub> surface.

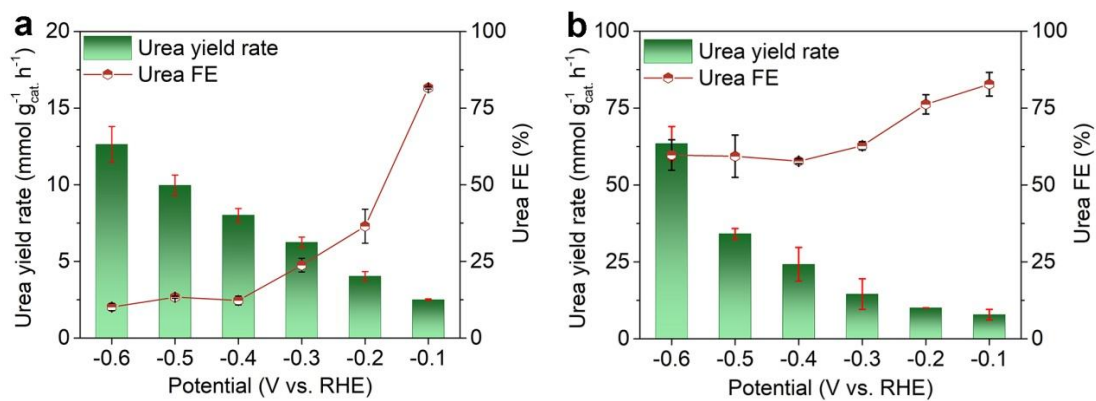

**Supplementary Fig. 51.** Urea yield rates and FEs using Pd<sub>4</sub>Cu<sub>1</sub>-FeNi(OH)<sub>2</sub> composite catalyst with different amounts of NaBH<sub>4</sub> assessed in H-cell, (a) 6 μmol, (b) 18 μmol. (a, b) Error bars in accordance with the standard deviation of at least three independent measurements.

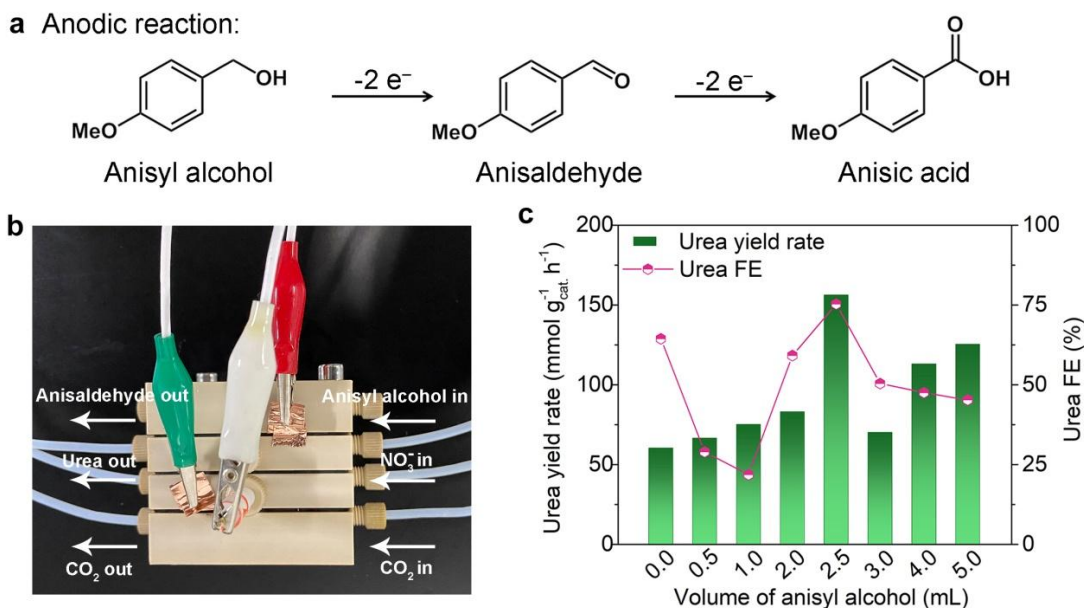

**Supplementary Fig. 52.** (a) Oxidation of anisyl alcohol at anode, (b) photograph of an actual GDE for urea electrosynthesis coupled with anisyl alcohol oxidation at anode. (c) The relationship of urea yield rates and FEs with different volumes of anisyl alcohol at anode using Pd<sub>4</sub>Cu<sub>1</sub>-FeNi(OH)<sub>2</sub> as a catalyst.

**Notes:** The oxidation of anisyl alcohol coupled with urea electrosynthesis at anode not only can acquire high-value anisaldehyde, but also lower cell voltage of the whole electrolysis. The total FE for anode and cathode can be greatly enhanced. As shown in Supplementary Fig. 52c, urea yield rate and FE are all enhanced with coupling oxidation of anisyl alcohol (2.5 mL) at anode using Pd<sub>4</sub>Cu<sub>1</sub>-FeNi(OH)<sub>2</sub> as a catalyst.

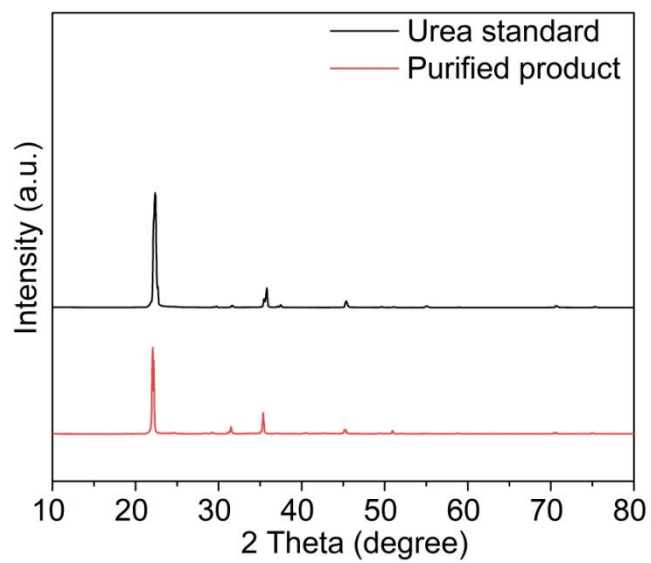

**Supplementary Fig. 53.** XRD pattern of purified urea product from the electrolyte.

**Supplementary Table 1.** The molar ratios of Pd to Cu in Pd<sub>x</sub>Cu<sub>1</sub>-Ni(OH)<sub>2</sub> composite samples determined by ICP-MS.

| Catalyst                                             | Molar ratio of Pd:Cu |
|------------------------------------------------------|----------------------|
| Pd <sub>1</sub> Cu <sub>1</sub> -Ni(OH) <sub>2</sub> | 1.1:1                |
| Pd <sub>2</sub> Cu <sub>1</sub> -Ni(OH) <sub>2</sub> | 2.0:1                |
| Pd <sub>3</sub> Cu <sub>1</sub> -Ni(OH) <sub>2</sub> | 3.0:1                |
| Pd <sub>4</sub> Cu <sub>1</sub> -Ni(OH) <sub>2</sub> | 3.8:1                |
| Pd <sub>5</sub> Cu <sub>1</sub> -Ni(OH) <sub>2</sub> | 5.1:1                |
| Pd <sub>6</sub> Cu <sub>1</sub> -Ni(OH) <sub>2</sub> | 5.9:1                |



**Supplementary Table 2.** EXAFS fitting parameters at the Pd, Cu and Ni K-edge for various samples ( $S_0^2=1.0$ ).

| Sample    | Path  | $N^a$ | $R(\text{\AA})^b$ | $\sigma^2(\text{\AA}^2)^c$ | $\Delta E_0(\text{eV})^d$ | R factor |
|-----------|-------|-------|-------------------|----------------------------|---------------------------|----------|
| Cu foil   | Cu-Cu | 12.00 | 2.54              | 0.0098                     | 4.21                      | 0.0076   |
| CuO       | Cu-O  | 6.00  | 1.95              | 0.0061                     | 7.45                      | 0.0163   |
|           | Cu-Cu | 7.92  | 2.89              | 0.0153                     | 2.22                      |          |
| Pd foil   | Pd-Pd | 11.66 | 2.74              | 0.0051                     | -6.20                     | 0.0033   |
| Sample Cu | Cu-O  | 3.05  | 2.05              | 0.0157                     | 9.07                      | 0.0191   |
|           | Cu-Pd | 10.71 | 2.61              | 0.0120                     | -5.09                     |          |
| Sample Pd | Pd-Cu | 1.35  | 2.62              | 0.0040                     | -8.64                     | 0.0067   |
|           | Pd-Pd | 7.87  | 2.70              | 0.0102                     | -6.15                     |          |
| Ni foil   | Ni-Ni | 12    | 2.48              | 0.0062                     | 5.9                       | 0.0016   |

<sup>a</sup>CN, coordination number; <sup>b</sup> $R$ , distance between absorber and backscatter atoms; <sup>c</sup> $\sigma^2$ , Debye-Waller factor to account for both thermal and structural disorders; <sup>d</sup> $\Delta E_0$ , inner potential correction;  $R$  factor indicates the goodness of the fit. Fitting range:  $3.0 \leq k (\text{\AA}^{-1}) \leq 12.0$  and  $1.2 \leq R (\text{\AA}) \leq 3.0$  (Cu foil);  $3.0 \leq k (\text{\AA}^{-1}) \leq 11.2$  and  $1.0 \leq R (\text{\AA}) \leq 2.8$  (CuO);  $3.0 \leq k (\text{\AA}^{-1}) \leq 12.0$  and  $1.0 \leq R (\text{\AA}) \leq 3.0$  (Pd foil);  $3.0 \leq k (\text{\AA}^{-1}) \leq 15.7$  and  $1.0 \leq R (\text{\AA}) \leq 3.0$  (Sample Cu);  $3.0 \leq k (\text{\AA}^{-1}) \leq 14.1$  and  $1.0 \leq R (\text{\AA}) \leq 3.0$  (Sample Pd).

**Supplementary Table 3.** Urea electrosynthesis from C–N coupling.

| Catalyst                                        | N-source        | Electrolyte                                      | FE (%) | Potential | Yield rate | $J_{\text{urea}}$ | Stability (h) | Electrode configuration | Ref. |
|-------------------------------------------------|-----------------|--------------------------------------------------|--------|-----------|------------|-------------------|---------------|-------------------------|------|
| Te-doped Pd                                     | $\text{NO}_2^-$ | 0.1 M $\text{KHCO}_3$ + 0.01 M $\text{KNO}_2$    | 12.2   | -1.1      | /          | 0.10              | 5             | H-Cell                  | S4   |
| ZnO-V <sub>o</sub>                              | $\text{NO}_2^-$ | 0.2 M $\text{NaHCO}_3$ + 0.1 M $\text{NaNO}_2$   | 23.3   | -0.79     | /          | 6.06              | 15            | H-Cell                  | S5   |
| Cu-TiO <sub>2</sub> -V <sub>o</sub>             | $\text{NO}_2^-$ | 0.2 M $\text{KHCO}_3$ + 0.02 M $\text{KNO}_2$    | 43.1   | -0.4      | 20.8       | 2.59              | 2             | H-Cell                  | S6   |
| Cd                                              | $\text{NO}_2^-$ | 0.2 M $\text{KHCO}_3$ + 0.02 M $\text{KNO}_3$    | 55     | -0.6      | /          | /                 | /             | GDE                     | S7   |
| AuCu                                            | $\text{NO}_2^-$ | 0.5 M $\text{KHCO}_3$ + 0.01 M $\text{KNO}_2$    | 24.7   | -1.1      | 64.8       | 0.49              | /             | H-Cell                  | S8   |
| Co-NiO <sub>x</sub> @GDY                        | $\text{NO}_2^-$ | 0.01 M $\text{NaNO}_2$                           | 64.3   | -0.7      | 15.2       | 3.86              | /             | H-cell                  | S9   |
| TiO <sub>2</sub> -V <sub>o</sub> /PdCu          | $\text{N}_2$    | 0.1 M $\text{KHCO}_3$                            | 8.9    | -0.4      | 3.4        | 0.05              | 12            | GDE                     | S10  |
| Bi/BiVO <sub>4</sub>                            | $\text{N}_2$    | 0.1 M $\text{KHCO}_3$                            | 12.6   | -0.4      | 5.9        | 0.48              | 10            | H-Cell                  | S11  |
| BiFeO <sub>3</sub> /BiVO <sub>4</sub>           | $\text{N}_2$    | 0.1 M $\text{KHCO}_3$                            | 17     | -0.4      | 4.9        | 3.06              | 10            | H-Cell                  | S12  |
| Ni <sub>3</sub> (BO <sub>3</sub> ) <sub>2</sub> | $\text{N}_2$    | 0.1 M $\text{KHCO}_3$                            | 20.4   | -0.5      | 9.7        | 0.33              | 20            | H-Cell                  | S13  |
| InOOH                                           | $\text{N}_2$    | 0.1 M $\text{KHCO}_3$                            | 21.0   | -0.4      | 6.9        | 0.13              | 5             | H-Cell                  | S14  |
| Co-PMDA-2-mbIM                                  | $\text{N}_2$    |                                                  | 48.97  | -0.5      | 14.5       | 0.98              | /             | H-cell                  | S15  |
| Zn NBs                                          | $\text{NO}$     | 0.2 M $\text{KHCO}_3$                            | 11.3   | -0.92     | 15.1       | 4.52              | 15            | H-Cell                  | S16  |
| Fe-Ni                                           | $\text{NO}_3^-$ | 0.1 M $\text{KHCO}_3$ + 50 mM $\text{KNO}_3$     | 17.8   | -1.5      | 20.2       | 8.01              | /             | H-Cell                  | S17  |
| XC72R-AuPd                                      | $\text{NO}_3^-$ | 0.075 M $\text{KHCO}_3$ + 0.025 M $\text{KNO}_3$ | 15.6   | -0.6      | 3.4        | 1.40              | /             | H-cell                  | S18  |
| V <sub>o</sub> -CeO <sub>2</sub> -750           | $\text{NO}_3^-$ | /                                                | /      | -1.6      | 15.7       | /                 | 5             | H-cell                  | S19  |
| Fe(a)@C-Fe <sub>3</sub> O <sub>4</sub> /CNTs    | $\text{NO}_3^-$ | 0.1 M $\text{KNO}_3$ + 0.1 M $\text{KSO}_4$      | 22.4   | -0.65     | 16.5       | 0.72              | /             | H-cell                  | S20  |
| Cu <sub>97</sub> In <sub>3</sub> -C             | $\text{NO}_3^-$ | 0.1 M $\text{KHCO}_3$ + 0.01 M $\text{KNO}_3$    | /      | /         | 13.1       | /                 | /             | H-cell                  | S21  |
| Cu <sub>1</sub> -CeO <sub>2</sub>               | $\text{NO}_3^-$ | 0.1 M $\text{KHCO}_3$ + 0.05 M $\text{KNO}_3$    | /      | /         | 52.8       | /                 | /             | H-cell                  | S22  |
| Zn                                              | $\text{NO}_3^-$ | 0.2 M $\text{KHCO}_3$ + 0.02 M $\text{KNO}_3$    | 35     | -1.75     | /          | 7.11              | /             | GDE                     | S23  |
| Ni-Pc                                           | $\text{NO}_3^-$ | 0.2 M $\text{KHCO}_3$ + 0.02 M $\text{KNO}_3$    | 40     | -1.5      | /          | 4.40              | /             | GDE                     | S24  |
| TiO <sub>2</sub> /Nafion                        | $\text{NO}_3^-$ | 0.1 M $\text{KNO}_3$                             | 40     | -0.5      | /          | 0.32              | 2.15          | H-Cell                  | S25  |

|                                                          |                                   |                                                       |             |             |              |             |             |            |                  |
|----------------------------------------------------------|-----------------------------------|-------------------------------------------------------|-------------|-------------|--------------|-------------|-------------|------------|------------------|
| In(OH) <sub>3</sub>                                      | NO <sub>3</sub> <sup>-</sup>      | 0.1 M KNO <sub>3</sub>                                | 53.4        | -0.6        | 8.9          | 0.53        | 12          | H-Cell     | S3               |
| V <sub>o</sub> -InOOH                                    | NO <sub>3</sub> <sup>-</sup>      | 0.1 M KNO <sub>3</sub>                                | 51.0        | -0.4        | 9.9          | 0.26        | 24          | H-Cell     | S26              |
| <b>Pd<sub>4</sub>Cu<sub>1</sub>-Ni(OH)<sub>2</sub></b>   | <b>NO<sub>3</sub><sup>-</sup></b> | <b>0.1 M KHCO<sub>3</sub> + 0.1 M KNO<sub>3</sub></b> | <b>64.4</b> | <b>-0.5</b> | <b>60.4</b>  | <b>2.30</b> | <b>380</b>  | <b>GDE</b> | <b>This work</b> |
| <b>Pd<sub>4</sub>Cu<sub>1</sub>-FeNi(OH)<sub>2</sub></b> | <b>NO<sub>3</sub><sup>-</sup></b> | <b>0.1 M KHCO<sub>3</sub> + 0.1 M KNO<sub>3</sub></b> | <b>66.4</b> | <b>-0.6</b> | <b>436.9</b> | <b>7.05</b> | <b>1000</b> | <b>GDE</b> | <b>This work</b> |

**Note:** The units for urea yield rate and urea partial current density are mmol g<sub>cat.</sub><sup>-1</sup> h<sup>-1</sup> mA cm<sup>-2</sup>, respectively.

**Supplementary Table 4.** Observed Raman frequencies and assignments for formamide and urea in Supplementary Fig. 31.

| Formamide              |                      | Urea                   |            |
|------------------------|----------------------|------------------------|------------|
| Freq, cm <sup>-1</sup> | assignment           | Freq, cm <sup>-1</sup> | assignment |
| 602                    | OCN bending          | 1000                   | v(C-N)     |
| 1091                   | NH <sub>2</sub> rock |                        |            |
| 1308                   | v(C-N)               |                        |            |
| 1390                   | C-H in-plane bending |                        |            |
| 1598                   | δNH <sub>2</sub>     |                        |            |
| 1668                   | H bonded formamide   |                        |            |

**Supplementary Table 5.** The Gibbs free energy change ( $\Delta G$ ) of reaction for CO<sub>2</sub>RR to CO on Cu<sub>1</sub>Pd(111) and Pd(111) at 0 V (vs. RHE).

| Intermediates     | Cu <sub>1</sub> Pd(111) | Pd(111) |
|-------------------|-------------------------|---------|
| *+CO <sub>2</sub> | 0                       | 0       |
| *CO <sub>2</sub>  | 0.32                    | 0.34    |
| *COOH             | 0.27                    | 0.24    |
| *CO               | -0.89                   | -0.86   |
| *+CO              | 0.70                    | 0.70    |

**Supplementary Table 6.** The Gibbs free energy change ( $\Delta G$ ) of reaction for urea formation on Cu<sub>1</sub>Pd(111), Pd(111), Cu(111) and Ni(111) at 0 V (vs. RHE).

| Intermediates                       | Cu <sub>1</sub> Pd(111) | Pd(111) | Cu(111) | Ni(111) |
|-------------------------------------|-------------------------|---------|---------|---------|
| *NO <sub>2</sub>                    | 0                       | 0       | 0       | 0       |
| *NO <sub>2</sub> H                  | 0.39                    | 0.39    | 0.57    | 0.50    |
| *NO                                 | -1.87                   | -2.17   | -0.91   | -1.10   |
| *HNO                                | -1.13                   | -1.02   | -0.46   | -0.01   |
| *H <sub>2</sub> NO                  | -1.37                   | -1.60   | -1.46   | -1.56   |
| *H <sub>2</sub> NOH                 | -1.56                   | -1.96   | -1.34   | -1.68   |
| *NH <sub>2</sub>                    | -3.44                   | -3.55   | -3.55   | -3.04   |
| *NH <sub>2</sub> CO                 | -3.37                   | -3.36   | -2.93   | -2.72   |
| *NH <sub>2</sub> CONH <sub>2</sub>  | -9.81                   | -9.82   | -9.57   | -9.50   |
| *+NH <sub>2</sub> CONH <sub>2</sub> | -10.36                  | -10.33  | -10.27  | -10.03  |

## Reference:

- S1. M. Li, Y. Chen, W. Li, X. Li, H. Tian, X. Wei, Z. Ren, G. Han, Ultrathin anatase TiO<sub>2</sub> nanosheets for high-performance photocatalytic hydrogen production, *Small* **2017**, *13*, 1604115.
- S2. A. N. Mansour, C. A. Melendres, Characterization of  $\alpha$ -Ni(OH)<sub>2</sub> by XPS, *Surf. Sci. Spectra* **1994**, *3*, 255–262.
- S3. C. Lv, L. Zhong, H. Liu, Z. Fang, C. Yan, M. Chen, Y. Kong, C. Lee, D. Liu, S. Li, J. Liu, L. Song, G. Chen, Q. Yan, G. Yu, Selective electrocatalytic synthesis of urea with nitrate and carbon dioxide, *Nat. Sustain.* **2021**, *4*, 868–876.
- S4. Y. Feng, H. Yang, Y. Zhang, X. Huang, L. Li, T. Cheng, Q. Shao, Te-doped Pd nanocrystal for electrochemical urea production by efficiently coupling carbon dioxide reduction with nitrite reduction, *Nano Lett.* **2020**, *20*, 8282–8289.
- S5. N. Meng, Y. Huang, Y. Liu, Y. Yu, B. Zhang, Electrosynthesis of urea from nitrite and CO<sub>2</sub> over oxygen vacancy-rich ZnO porous nanosheets, *Cell Rep. Phys. Sci.* **2021**, *2*, 100378.
- S6. N. Cao, Y. Quan, A. Guan, C. Yang, Y. Ji, L. Zhang, G. Zheng, Oxygen vacancies enhanced cooperative electrocatalytic reduction of carbon dioxide and nitrite ions to urea, *J. Colloid Interface Sci.* **2020**, *577*, 109–114.
- S7. M. Shibata, K. Yoshida, N. Furuya, Electrochemical synthesis of urea at gas-diffusion electrodes: III. Simultaneous reduction of carbon dioxide and nitrite ions with various metal catalysts, *J. Electrochem. Soc.* **1998**, *145*, 595–600.
- S8. S. Liu, S. Yin, Z. Wang, Y. Xu, X. Li, L. Wang, H. Wang, AuCu nanofibers for electrosynthesis of urea from carbon dioxide and nitrite, *Cell Rep. Phys. Sci.* **2022**, *3*, 100869.
- S9. D. Zhang, Y. Xue, X. Zheng, C. Zhang, Y. Li, Multi-heterointerfaces for selective and efficient urea production, *Nat. Sci. Rev.*, **2022**, *nwac209*.
- S10. C. Chen, X. Zhu, X. Wen, Y. Zhou, L. Zhou, H. Li, L. Tao, Q. Li, S. Du, T. Liu, D. Yan, C. Xie, Y. Zou, Y. Wang, R. Chen, J. Huo, Y. Li, J. Cheng, H. Su, X. Zhao, W. Cheng, Q. Liu, H. Lin, J. Luo, J. Chen, M. Dong, K. Cheng, C. Li, S. Wang, Coupling N<sub>2</sub> and CO<sub>2</sub> in H<sub>2</sub>O to synthesize urea under ambient conditions, *Nat. Chem.* **2020**, *12*, 717–724.
- S11. M. Yuan, J. Chen, Y. Bai, Z. Liu, J. Zhang, T. Zhao, Q. Wang, S. Li, H. He, G. Zhang, Unveiling electrochemical urea synthesis by co-activation of CO<sub>2</sub> and N<sub>2</sub> with Mott–Schottky heterostructure catalysts, *Angew. Chem. Int. Ed.* **2021**, *60*, 10910–10918.
- S12. M. Yuan, J. Chen, Y. Bai, Z. Liu, J. Zhang, T. Zhao, Q. Shi, S. Li, X. Wang, G. Zhang, Electrochemical C–N coupling with perovskite hybrids toward efficient urea synthesis, *Chem. Sci.* **2021**, *12*, 6048–6058.
- S13. M. Yuan, J. Chen, Y. Xu, R. Liu, T. Zhao, J. Zhang, Z. Ren, Z. Liu, C. Streb, H. He, C. Yang, S. Zhang, G. Zhang, Highly selective electroreduction of N<sub>2</sub> and CO<sub>2</sub> to urea over artificial frustrated Lewis pairs, *Energy Environ. Sci.* **2021**, *14*, 6605–6615.
- S14. M. Yuan, H. Zhang, Y. Xu, R. Liu, R. Wang, T. Zhao, J. Zhang, Z. Liu, H. He, C. Yang, S. Zhang, G. Zhang, Artificial frustrated Lewis pairs facilitating the electrochemical N<sub>2</sub> and CO<sub>2</sub> conversion to urea, *Chem. Catal.* **2022**, *2*, 309–320.

- S15. M. Yuan, J. Chen, H. Zhang, Q. Li, L. Zhou, C. Yang, R. Liu, Z. Liu, S. Zhang and G. Zhang, Host-guest molecular interaction promoted urea electrosynthesis over precisely designed conductive metal-organic Frameworks. *Energy Environ. Sci.* **2022**, *15*, 2084–2095.
- S16. Y. Huang, R. Yang, C. Wang, N. Meng, Y. Shi, Y. Yu, B. Zhang, Direct electrosynthesis of urea from carbon dioxide and nitric oxide, *ACS Energy Lett.* **2022**, *7*, 284–291.
- S17. X. Zhang, X. Zhu, S. Bo, C. Chen, M. Qiu, X. Wei, N. He, C. Xie, W. Chen, J. Zheng, P. Chen, S. Jiang, Y. Li, Q. N. Liu, S. Wang, Identifying and tailoring C–N coupling site for efficient urea synthesis over diatomic Fe–Ni catalyst, *Nat. Commun.* **2022**, *13*, 5337.
- S18. H. Wang, Y. Jiang, S. Li, F. Gou, X. Liu, Y. Jiang, W. Luo, W. Shen, R. He, M. Li, Realizing efficient C–N coupling via electrochemical co-reduction of CO<sub>2</sub> and NO<sub>3</sub><sup>−</sup> on AuPd nanoalloy to form urea: Key C–N coupling intermediate, *Appl. Catal. B Environ.* **2022**, *318*, 121819.
- S19. X. Wei, X. Wen, Y. Liu, C. Chen, C. Xie, D. Wang, M. Qiu, N. He, P. Zhou, W. Chen, J. Cheng, H. Lin, J. Jia, X. Fu, S. Wang, Oxygen vacancy-mediated selective C–N coupling toward electrocatalytic urea synthesis, *J. Am. Chem. Soc.* **2022**, *144*, 11530–11535.
- S20. J. Geng, S. Ji, M. Jin, C. Zhang, M. Xu, G. Wang, C. Liang, H. Zhang, Ambient electrosynthesis of urea with nitrate and carbon dioxide over iron-based dual-sites, *Angew. Chem. Int. Ed.* **2023**, *62*, e2022109.
- S21. Y. Liu, X. Tu, X. Wei, D. Wang, X. Zhang, W. Chen, C. Chen, S. Wang, C-bound or O-bound surface: which one boosts electrocatalytic urea synthesis? *Angew. Chem. Int. Ed.* **2023**, 10.1002/anie.202300387.
- S22. X. Wei, Y. Liu, X. Zhu, S. Bo, L. Xiao, C. Chen, T. Nga, Y. He, M. Qiu, C. Xie, D. Wang, Q. Liu, F. Dong, C. Dong, X. Fu, S. Wang, Dynamic reconstitution between copper single atoms and clusters for electrocatalytic urea synthesis, *Adv. Mater.* **2023**, 2300020.
- S23. M. Shibata, K. Yoshida, N. Furuya, Electrochemical synthesis of urea at gas-diffusion electrodes: IV. simultaneous reduction of carbon dioxide and nitrate ions with various metal catalysts, *J. Electrochem. Soc.* **1998**, *145*, 2348–2353.
- S24. M. Shibata, N. Furuya, Electrochemical synthesis of urea at gas-diffusion electrodes: Part VI. Simultaneous reduction of carbon dioxide and nitrite ions with various metallophthalocyanine catalysts. *J. Electroanal. Chem.* **2001**, *507*, 177–184.
- S25. D. Saravanakumar, J. Song, S. Lee, N. H. Hur, W. Shin, Electrocatalytic conversion of carbon dioxide and nitrate ions to urea by a titania–nafion composite electrode, *ChemSusChem* **2017**, *10*, 3999–4003.
- S26. C. Lv, C. Lee, L. Zhong, H. Liu, J. Liu, L. Yang, C. Yan, W. Yu, H. H. Hng, Z. Qi, L. Song, S. Li, K. P. Loh, Q. Yan, G. Yu, A defect engineered electrocatalyst that promotes high-efficiency urea synthesis under ambient conditions, *ACS Nano* **2022**, *16*, 8213–8222.
